# Supplementary material for: Sucrose 6F-phosphate phosphorylase: a novel insight in the human gut microbiome
Source: PubMed Central journal article supplement (PMC6521584; doi:10.1099/mgen.0.000253), 2019-03-26
Supplement: mgen-5-253-s001.pdf [file mgen-5-253-s001.pdf]

## Supplementary information

**Table S1.** Primer used during PCR and qRT-PCR assays

|                | <b>Primers name</b> | <b>Primers sequence 5' – 3'</b> |
|----------------|---------------------|---------------------------------|
| <b>PCR</b>     | <i>Rgspp-F</i>      | TCACCAAAAGTGTGGGAGTTT           |
|                | <i>Rgspp-R</i>      | CTGCGCCGTAAGAGGCTAT             |
| <b>qRT-PCR</b> | <i>Rgspp-F</i>      | AGGAGATATACCATGAACAGTAAACCGATG  |
|                | <i>Rgspp-R</i>      | GTGATGGTGATGTTTTTTGCTTCTACTAT   |
|                | <i>RgrpB-F</i>      | GGGGAAGAAGTGGAGAACGTA           |
|                | <i>RgrpB-R</i>      | TTCCATATCAGGAGCGAAATC           |
|                | <i>RggyrB-F</i>     | CAATTCTGTGACGGTCGTTG            |
|                | <i>RggyrB-R</i>     | AATCCCTGCCTTGTGGTTTA            |
| <b>16S RNA</b> | <i>16F8</i>         | AGAGTTTGATCCTGGCTGAG            |
|                | <i>16R1541</i>      | AAGGAGGTGATCCAGCCGCA            |

Primers sequences used for the cloning of *Rgspp* and for qRT-PCR and 16S RNA analysis.

**Table S2. Composition of the diets used for *in vivo* assays**

| <b>Ingredient, g/kg (as-fed basis)</b> | <b>Control diet</b> | <b>High Fat diet</b> |
|----------------------------------------|---------------------|----------------------|
| Casein                                 | 200                 | 200                  |
| L- Cystine                             | 3                   | 3                    |
| Maltodextrin                           | 320                 | 125                  |
| Sucrose                                | 350                 | 68.8                 |
| scFOS                                  | 0                   | 0                    |
| Cellulose                              | 50                  | 50                   |
| Soybean oil                            | 25                  | 25                   |
| Lard                                   | 20                  | 245                  |
| Mineral mix <sup>1</sup>               | 10                  | 10                   |
| <i>Analyzed Composition (DM basis)</i> |                     |                      |
| <i>DM<sup>2</sup>, g/100g</i>          |                     |                      |
| Crude Protein, g/100g                  | 19.2                | 26.2                 |
| Carbohydrates, g/100g                  | 67.3                | 26.3                 |
| Fat <sup>2</sup> , g/100g              | 4.3                 | 34.9                 |
| Energy, kcal/kg                        | 3.84                | 5.24                 |

<sup>1</sup>Di-calcium phosphate, calcium carbonate, potassium citrate, vitamin mix, choline bitartrate, FD&C

**Table S3. BlastP of GH13\_18 sequences against the IGC.pep catalogue (E-value=0, identity  $\geq$ 90%).** For each sequence, the catalogue sequence presenting the highest identity value was kept. Among the GH13\_18 sequences, 954 sequences showed homology with 64 sequences in the catalogue. *RgSPP*, some characterized GH13\_18 and the ones presenting high synteny with *RgSPP* are indicated in bold.

| Catalogue ID       | Genbank accession number | Organism                              | % of identity | e-value | Number of subjects among the 1267 | Prevalence (%) | Abundance  |
|--------------------|--------------------------|---------------------------------------|---------------|---------|-----------------------------------|----------------|------------|
| T2D-142A_GL0052653 | AAN80246.1               | Escherichia coli CFT073               | 97.80         | 0.0     | 389                               | 30.70          | 0.00017529 |
| T2D-142A_GL0052653 | ABE07057.1               | Escherichia coli UTI89                | 97.61         | 0.0     |                                   |                |            |
| T2D-142A_GL0052653 | ABG69372.1               | Escherichia coli 536                  | 97.98         | 0.0     |                                   |                |            |
| T2D-142A_GL0052653 | ABJ00761.1               | Escherichia coli APEC O1              | 97.61         | 0.0     |                                   |                |            |
| T2D-142A_GL0052653 | ADE89798.1               | Escherichia coli IHE3034              | 97.44         | 0.0     |                                   |                |            |
| T2D-142A_GL0052653 | ADN46145.1               | Escherichia coli ABU 83972            | 97.80         | 0.0     |                                   |                |            |
| T2D-142A_GL0052653 | ADN71421.1               | Escherichia coli UM146                | 97.44         | 0.0     |                                   |                |            |
| T2D-142A_GL0052653 | ADR26772.1               | Escherichia coli O83:H1 str. NRG 857C | 97.99         | 0.0     |                                   |                |            |
| T2D-142A_GL0052653 | AEG36324.1               | Escherichia coli NA114                | 97.80         | 0.0     |                                   |                |            |
| T2D-142A_GL0052653 | AER84181.1               | Escherichia coli str. clone D i2      | 97.80         | 0.0     |                                   |                |            |
| T2D-142A_GL0052653 | AER89100.1               | Escherichia coli str. clone D i14     | 97.80         | 0.0     |                                   |                |            |
| T2D-142A_GL0052653 | AGY87305.1               | Escherichia coli JJ1886               | 97.62         | 0.0     |                                   |                |            |
| T2D-142A_GL0052653 | AID78459.1               | Escherichia coli Nissle 1917          | 97.62         | 0.0     |                                   |                |            |
| T2D-142A_GL0052653 | AIL16739.1               | Escherichia coli ATCC 25922           | 97.62         | 0.0     |                                   |                |            |
| T2D-142A_GL0052653 | AJB39624.1               | Escherichia coli APEC IMT5155         | 97.44         | 0.0     |                                   |                |            |
| T2D-142A_GL0052653 | AJM73548.1               | Escherichia coli RS218                | 97.44         | 0.0     |                                   |                |            |
| T2D-142A_GL0052653 | AJO83374.1               | Escherichia coli MNCRE44              | 97.62         | 0.0     |                                   |                |            |
| T2D-142A_GL0052653 | AKK42380.1               | Escherichia coli NMEC O18             | 97.44         | 0.0     |                                   |                |            |
| T2D-142A_GL0052653 | ALD25449.1               | Escherichia coli SF-468               | 97.43         | 0.0     |                                   |                |            |
| T2D-142A_GL0052653 | ALD30522.1               | Escherichia coli SF-173               | 97.44         | 0.0     |                                   |                |            |
| T2D-142A_GL0052653 | ALD35474.1               | Escherichia coli SF-166               | 97.44         | 0.0     |                                   |                |            |
| T2D-142A_GL0052653 | ALD40227.1               | Escherichia coli SF-088               | 97.44         | 0.0     |                                   |                |            |
| T2D-142A_GL0052653 | ALT49205.1               | Escherichia coli uk_P46212            | 97.62         | 0.0     |                                   |                |            |
| T2D-142A_GL0052653 | ALXS2262.1               | Escherichia coli CD306                | 97.62         | 0.0     |                                   |                |            |
| T2D-142A_GL0052653 | ALX57369.1               | Escherichia coli JJ2434               | 97.62         | 0.0     |                                   |                |            |
| T2D-142A_GL0052653 | ALX62404.1               | Escherichia coli JJ1897               | 97.62         | 0.0     |                                   |                |            |
| T2D-142A_GL0052653 | AML04473.1               | Escherichia coli G749                 | 97.62         | 0.0     |                                   |                |            |
| T2D-142A_GL0052653 | AML09432.1               | Escherichia coli MVASt0167            | 97.62         | 0.0     |                                   |                |            |
| T2D-142A_GL0052653 | AML14237.1               | Escherichia coli SaT040               | 97.62         | 0.0     |                                   |                |            |
| T2D-142A_GL0052653 | AML19255.1               | Escherichia coli ZH193                | 97.62         | 0.0     |                                   |                |            |
| T2D-142A_GL0052653 | AMM36204.1               | Escherichia coli ZH063                | 97.44         | 0.0     |                                   |                |            |
| T2D-142A_GL0052653 | AMQ51066.1               | Escherichia coli JJ1887               | 97.62         | 0.0     |                                   |                |            |
| T2D-142A_GL0052653 | AMX15579.1               | Escherichia coli Ecol_732             | 97.62         | 0.0     |                                   |                |            |
| T2D-142A_GL0052653 | AMX28949.1               | Escherichia coli Ecol_743             | 97.62         | 0.0     |                                   |                |            |
| T2D-142A_GL0052653 | AMX36582.1               | Escherichia coli Ecol_745             | 97.62         | 0.0     |                                   |                |            |
| T2D-142A_GL0052653 | AMX39419.1               | Escherichia coli Ecol_448             | 97.62         | 0.0     |                                   |                |            |
| T2D-142A_GL0052653 | ANJ42350.1               | Escherichia coli NGF1                 | 97.99         | 0.0     |                                   |                |            |
| T2D-142A_GL0052653 | ANK01347.1               | Escherichia coli O25b:H4              | 97.80         | 0.0     |                                   |                |            |
| T2D-142A_GL0052653 | ANK32050.1               | Escherichia coli ECONIH2              | 97.80         | 0.0     |                                   |                |            |
| T2D-142A_GL0052653 | ANK53034.1               | Escherichia coli Eco889               | 97.62         | 0.0     |                                   |                |            |
| T2D-142A_GL0052653 | ANR85697.1               | Escherichia coli K-15KW01             | 97.80         | 0.0     |                                   |                |            |
| T2D-142A_GL0052653 | ANV93451.1               | Escherichia coli UPEC 26-1            | 97.62         | 0.0     |                                   |                |            |
| T2D-142A_GL0052653 | APK33892.1               | Escherichia coli D8                   | 97.25         | 0.0     |                                   |                |            |
| T2D-142A_GL0052653 | AQV23300.1               | Escherichia coli Ecol_276             | 97.62         | 0.0     |                                   |                |            |
| T2D-142A_GL0052653 | AQV45525.1               | Escherichia coli Ecol_542             | 97.62         | 0.0     |                                   |                |            |
| T2D-142A_GL0052653 | AQV59457.1               | Escherichia coli Ecol_656             | 97.62         | 0.0     |                                   |                |            |
| T2D-142A_GL0052653 | AQV61545.1               | Escherichia coli Ecol_867             | 97.62         | 0.0     |                                   |                |            |
| T2D-142A_GL0052653 | AQV71396.1               | Escherichia coli Ecol_AZ146           | 97.62         | 0.0     |                                   |                |            |
| T2D-142A_GL0052653 | AQV82835.1               | Escherichia coli Ecol_AZ153           | 97.62         | 0.0     |                                   |                |            |
| T2D-142A_GL0052653 | AQW02399.1               | Escherichia coli Ecol_AZ159           | 97.62         | 0.0     |                                   |                |            |
| T2D-142A_GL0052653 | AQW09527.1               | Escherichia coli Ecol_AZ161           | 97.62         | 0.0     |                                   |                |            |
| T2D-142A_GL0052653 | AQW14315.1               | Escherichia coli Ecol_AZ162           | 97.62         | 0.0     |                                   |                |            |
| T2D-142A_GL0052653 | AQW17674.1               | Escherichia coli Ecol_244             | 97.62         | 0.0     |                                   |                |            |
| T2D-142A_GL0052653 | AQX96554.1               | Escherichia coli NU14                 | 97.44         | 0.0     |                                   |                |            |
| T2D-142A_GL0052653 | ARA64169.1               | Escherichia coli AR_0104              | 97.62         | 0.0     |                                   |                |            |
| T2D-142A_GL0052653 | ARR63777.1               | Escherichia coli strain Z247          | 97.62         | 0.0     |                                   |                |            |
| T2D-142A_GL0052653 | ART44327.1               | Escherichia coli 81009                | 97.62         | 0.0     |                                   |                |            |
| T2D-142A_GL0052653 | ARX26029.1               | Escherichia coli AR_0058              | 97.62         | 0.0     |                                   |                |            |
| T2D-142A_GL0052653 | ASA42985.1               | Escherichia coli H105                 | 97.62         | 0.0     |                                   |                |            |
| T2D-142A_GL0052653 | ASC19280.1               | Escherichia coli AR_0055              | 97.62         | 0.0     |                                   |                |            |
| T2D-142A_GL0052653 | ASJ30916.1               | Escherichia coli PSUO2                | 97.99         | 0.0     |                                   |                |            |
| T2D-142A_GL0052653 | ASW59453.1               | Escherichia coli PA45B                | 97.44         | 0.0     |                                   |                |            |
| T2D-142A_GL0052653 | ATB78588.1               | Escherichia coli 317                  | 97.99         | 0.0     |                                   |                |            |
| T2D-142A_GL0052653 | ATC17600.1               | Escherichia coli 1105                 | 97.80         | 0.0     |                                   |                |            |
| T2D-142A_GL0052653 | ATV08513.1               | Escherichia coli BH100                | 97.80         | 0.0     |                                   |                |            |
| T2D-142A_GL0052653 | ATV51204.1               | Escherichia coli LS4                  | 97.62         | 0.0     |                                   |                |            |
| T2D-142A_GL0052653 | ATY17967.1               | Escherichia coli AR_0017              | 97.99         | 0.0     |                                   |                |            |
| T2D-142A_GL0052653 | AUF90477.1               | Escherichia coli BH100                | 97.80         | 0.0     |                                   |                |            |
| T2D-142A_GL0052653 | AUG64391.1               | Escherichia coli ExPEC XM             | 97.44         | 0.0     |                                   |                |            |
| T2D-142A_GL0052653 | AUG92998.1               | Escherichia coli MS8345               | 97.25         | 0.0     |                                   |                |            |
| T2D-142A_GL0052653 | AUM08401.1               | Escherichia coli STEC299              | 97.44         | 0.0     |                                   |                |            |
| T2D-142A_GL0052653 | AUN89926.1               | Escherichia coli BH100N               | 97.80         | 0.0     |                                   |                |            |
| T2D-142A_GL0052653 | AUQ36916.1               | Escherichia coli BH100L               | 97.80         | 0.0     |                                   |                |            |
| T2D-142A_GL0052653 | AUY42350.1               | Escherichia coli HS13-1               | 97.44         | 0.0     |                                   |                |            |
| T2D-142A_GL0052653 | AUZ93285.1               | Escherichia coli FHI_NMBU_03          | 97.25         | 0.0     |                                   |                |            |
| T2D-142A_GL0052653 | AVF98922.1               | Escherichia coli FDAARGOS_144         | 97.62         | 0.0     |                                   |                |            |
| T2D-142A_GL0052653 | AVN39919.1               | Escherichia coli AR_0081              | 97.62         | 0.0     |                                   |                |            |
| T2D-142A_GL0052653 | AVQ75855.1               | Escherichia coli MS7163               | 97.44         | 0.0     |                                   |                |            |
| T2D-142A_GL0052653 | AVV70792.1               | Escherichia coli RM14723              | 97.80         | 0.0     |                                   |                |            |
| T2D-142A_GL0052653 | AVV75339.1               | Escherichia coli RM14715              | 97.80         | 0.0     |                                   |                |            |
| T2D-142A_GL0052653 | AVZ59281.1               | Escherichia coli Mt1B1                | 97.99         | 0.0     |                                   |                |            |
| T2D-142A_GL0052653 | AWR74182.1               | Escherichia coli E41-1                | 97.62         | 0.0     |                                   |                |            |
| T2D-142A_GL0052653 | AWZ79519.1               | Escherichia coli AR_451               | 97.62         | 0.0     |                                   |                |            |
| T2D-142A_GL0052653 | BAI54830.1               | Escherichia coli SE15                 | 97.80         | 0.0     |                                   |                |            |
| T2D-142A_GL0052653 | CAP75853.1               | Escherichia coli LF82                 | 97.99         | 0.0     |                                   |                |            |
| T2D-142A_GL0052653 | CAR02770.1               | Escherichia coli S88                  | 97.44         | 0.0     |                                   |                |            |
| T2D-142A_GL0052653 | CAR07715.2               | Escherichia coli ED1a                 | 97.44         | 0.0     |                                   |                |            |
| T2D-142A_GL0052653 | CDH64955.1               | Escherichia coli PMV-1                | 97.44         | 0.0     |                                   |                |            |

|                     |                   |                                                    |              |            |     |       |
|---------------------|-------------------|----------------------------------------------------|--------------|------------|-----|-------|
| T2D-142A_GL0052653  | CDN81921.1        | Escherichia coli O25b:H4-ST131 EC958               | 97.80        | 0.0        |     |       |
| T2D-142A_GL0052653  | CK113066.1        | Escherichia coli NCTC9001                          | 97.44        | 0.0        |     |       |
| V1_CD40-0_GL0031705 | BAQ30221.1        | Bifidobacterium scardovii JCM 12489 = DSM 13734    | 99.63        | 0.0        | 5   | 0.39  |
| 290338.CKO_03578    | ABV14657.1        | Citrobacter koseri ATCC BAA-895                    | 100.00       | 0.0        | 17  | 1.34  |
| 290338.CKO_03578    | ASE82016.1        | Citrobacter koseri FDAARGOS_287                    | 98.95        | 0.0        |     |       |
| 290338.CKO_03578    | ATF95846.1        | Citrobacter koseri FDAARGOS_393                    | 98.95        | 0.0        |     |       |
| 290338.CKO_03578    | AVE57097.1        | Citrobacter koseri AR_0025                         | 98.59        | 0.0        |     |       |
| 290338.CKO_03578    | AVE67039.1        | Citrobacter koseri AR_0024                         | 98.95        | 0.0        |     |       |
| 290338.CKO_03578    | CD285138.1        | Citrobacter koseri                                 | 98.42        | 0.0        |     |       |
| V1_UC61-0_GL0056769 | ACB15767.1        | Escherichia coli SMS-3-5                           | 99.82        | 0.0        | 256 | 20.21 |
| V1_UC61-0_GL0056769 | AEQ12362.1        | Escherichia coli O7:K1 str. CE10                   | 100.00       | 0.0        |     |       |
| V1_UC61-0_GL0056769 | AIX63173.1        | Escherichia coli ECONIH1                           | 99.46        | 0.0        |     |       |
| V1_UC61-0_GL0056769 | ALV68816.1        | Escherichia coli ST648                             | 99.46        | 0.0        |     |       |
| V1_UC61-0_GL0056769 | AOM69735.1        | Escherichia coli MS6198                            | 99.46        | 0.0        |     |       |
| V1_UC61-0_GL0056769 | AQV66632.1        | Escherichia coli Ecol_881                          | 99.46        | 0.0        |     |       |
| V1_UC61-0_GL0056769 | AS116718.1        | Escherichia coli M160133                           | 97.67        | 0.0        |     |       |
| V1_UC61-0_GL0056769 | ASO87834.1        | Escherichia coli PAR                               | 95.71        | 0.0        |     |       |
| V1_UC61-0_GL0056769 | ATB93258.1        | Escherichia coli 1428                              | 99.46        | 0.0        |     |       |
| V1_UC61-0_GL0056769 | ATX15008.1        | Escherichia coli CREC-544                          | 98.57        | 0.0        |     |       |
| V1_UC61-0_GL0056769 | AVI13122.1        | Escherichia coli WB61                              | 97.67        | 0.0        |     |       |
| V1_UC61-0_GL0056769 | AWR49132.1        | Escherichia coli CCUG 70745                        | 99.46        | 0.0        |     |       |
| V1_UC61-0_GL0056769 | AWR84087.1        | Escherichia coli H17                               | 99.82        | 0.0        |     |       |
| V1_UC61-0_GL0056769 | AWT01653.1        | Escherichia coli 2016C-3878                        | 98.57        | 0.0        |     |       |
| V1_UC61-0_GL0056769 | AXG61473.1        | Escherichia coli MCICHV-1                          | 95.71        | 0.0        |     |       |
| V1_UC61-0_GL0056769 | BAX116129.1       | Escherichia coli MRV15-117                         | 98.57        | 0.0        |     |       |
| V1_UC61-0_GL0056769 | BAX21068.1        | Escherichia coli MRV15-131                         | 98.57        | 0.0        |     |       |
| V1_UC61-0_GL0056769 | CAR17791.1        | Escherichia coli IA139                             | 99.82        | 0.0        |     |       |
| V1_UC61-0_GL0056769 | CAS09049.1        | Escherichia coli O127:H6 str. E2348/69             | 97.50        | 0.0        |     |       |
| V1_UC61-0_GL0056769 | SLM06486.1        | Escherichia coli O127:H6                           | 97.50        | 0.0        |     |       |
| V1_UC61-0_GL0056769 | SNU21699.1        | Escherichia coli O127:H6                           | 97.50        | 0.0        |     |       |
| 656408.ECPG_02507   | AAC74391.2        | Escherichia coli str. K-12 substr. MG1655          | 99.64        | 0.0        | 537 | 42.38 |
| 656408.ECPG_02507   | ABV05755.1        | Escherichia coli HS                                | 99.46        | 0.0        |     |       |
| 656408.ECPG_02507   | ABV18679.1        | Escherichia coli O139:H28 str. E24377A             | 99.82        | 0.0        |     |       |
| 656408.ECPG_02507   | ACA77951.1        | Escherichia coli ATCC 8739                         | 99.82        | 0.0        |     |       |
| 656408.ECPG_02507   | ACB02530.1        | Escherichia coli str. K-12 substr. DH10B           | 99.64        | 0.0        |     |       |
| 656408.ECPG_02507   | ACR64429.1        | Escherichia coli BW2952 K-12                       | 99.64        | 0.0        |     |       |
| 656408.ECPG_02507   | ACT29335.1        | Escherichia coli BL21-Gold(DE3)pLysS AG            | 99.82        | 0.0        |     |       |
| 656408.ECPG_02507   | ACT38961.1        | Escherichia coli B str. REL606                     | 99.82        | 0.0        |     |       |
| 656408.ECPG_02507   | ACX39980.1        | Escherichia coli DH1                               | 99.64        | 0.0        |     |       |
| 656408.ECPG_02507   | ADT74891.1        | Escherichia coli W                                 | 99.64        | 0.0        |     |       |
| 656408.ECPG_02507   | ADX51143.1        | Escherichia coli KO11FL                            | 99.64        | 0.0        |     |       |
| 656408.ECPG_02507   | AEE56242.1        | Escherichia coli UMNK88                            | 99.46        | 0.0        |     |       |
| 656408.ECPG_02507   | AJE56318.1        | Escherichia coli UMN18                             | 99.41        | 0.0        |     |       |
| 656408.ECPG_02507   | AFG40636.1        | Escherichia coli P12b                              | 99.65        | 0.0        |     |       |
| 656408.ECPG_02507   | AFS57432.1        | Escherichia coli O104:H4 str. 2009EL-2050          | 99.82        | 0.0        |     |       |
| 656408.ECPG_02507   | AFS74642.1        | Escherichia coli O104:H4 str. 2011C-3493           | 99.82        | 0.0        |     |       |
| 656408.ECPG_02507   | AFS86125.1        | Escherichia coli O104:H4 str. 2009EL-2071          | 99.82        | 0.0        |     |       |
| 656408.ECPG_02507   | AGC86813.1        | Escherichia coli APEC O78                          | 99.82        | 0.0        |     |       |
| 656408.ECPG_02507   | AGW11524.1        | Escherichia coli LY180                             | 99.64        | 0.0        |     |       |
| 656408.ECPG_02507   | AGX33423.1        | synthetic Escherichia coli C321.deltaA             | 99.64        | 0.0        |     |       |
| 656408.ECPG_02507   | AHM34759.1        | Escherichia coli ST540                             | 99.46        | 0.0        |     |       |
| 656408.ECPG_02507   | AIF36622.1        | Escherichia coli KLY                               | 99.64        | 0.0        |     |       |
| 656408.ECPG_02507   | AIF60392.1        | Escherichia coli B7A                               | 99.60        | 0.0        |     |       |
| 656408.ECPG_02507   | AIF60393.1        | Escherichia coli B7A                               | 99.66        | 0.0        |     |       |
| 656408.ECPG_02507   | AIN31770.1        | Escherichia coli BW25113 K-12                      | 99.64        | 0.0        |     |       |
| 656408.ECPG_02507   | AIT34502.1        | Escherichia coli FAP1                              | 100.00       | 0.0        |     |       |
| 656408.ECPG_02507   | AIZ27791.1        | Escherichia coli ER2796                            | 99.64        | 0.0        |     |       |
| 656408.ECPG_02507   | AIZ51116.1        | Escherichia coli K-12 ER3413                       | 99.64        | 0.0        |     |       |
| 656408.ECPG_02507   | AIZ82403.1        | Escherichia coli RM9387                            | 99.28        | 0.0        |     |       |
| 656408.ECPG_02507   | AIZ86885.1        | Escherichia coli 94-3024                           | 99.82        | 0.0        |     |       |
| 656408.ECPG_02507   | AJB51432.1        | Escherichia coli 6409                              | 99.82        | 0.0        |     |       |
| 656408.ECPG_02507   | AJES5666.1        | Escherichia coli 789                               | 99.82        | 0.0        |     |       |
| 656408.ECPG_02507   | AJF56182.1        | Escherichia coli 1303                              | 99.82        | 0.0        |     |       |
| 656408.ECPG_02507   | AJF76654.1        | Escherichia coli C41(DE3)                          | 99.82        | 0.0        |     |       |
| 656408.ECPG_02507   | AJG08293.1        | Escherichia coli ECC-1470                          | 99.82        | 0.0        |     |       |
| 656408.ECPG_02507   | AJH10173.1        | Escherichia coli BL21 (TaKaRa)                     | 99.82        | 0.0        |     |       |
| 656408.ECPG_02507   | AKA90383.1        | Escherichia coli VR50                              | 99.82        | 0.0        |     |       |
| 656408.ECPG_02507   | AKC12089.1        | Escherichia coli C15                               | 99.82        | 0.0        |     |       |
| 656408.ECPG_02507   | AKD60861.1        | Escherichia coli K-12 ER3454                       | 99.64        | 0.0        |     |       |
| 656408.ECPG_02507   | AKD65235.1        | Escherichia coli K-12 ER3440                       | 99.64        | 0.0        |     |       |
| 656408.ECPG_02507   | AKD69604.1        | Escherichia coli K-12 ER3476                       | 99.64        | 0.0        |     |       |
| 656408.ECPG_02507   | AKD73956.1        | Escherichia coli K-12 ER3445                       | 99.64        | 0.0        |     |       |
| 656408.ECPG_02507   | AKD78366.1        | Escherichia coli K-12 ER3466                       | 99.64        | 0.0        |     |       |
| 656408.ECPG_02507   | AKD82735.1        | Escherichia coli K-12 ER3446                       | 99.64        | 0.0        |     |       |
| 656408.ECPG_02507   | AKD87095.1        | Escherichia coli K-12 ER3475                       | 99.64        | 0.0        |     |       |
| 656408.ECPG_02507   | AKD91505.1        | Escherichia coli K-12 ER3435                       | 99.64        | 0.0        |     |       |
| 656408.ECPG_02507   | AKE84592.1        | Escherichia coli O104:H4 str. C227-11              | 99.82        | 0.0        |     |       |
| 656408.ECPG_02507   | AKF20376.1        | Escherichia coli SEC470                            | 99.64        | 0.0        |     |       |
| 656408.ECPG_02507   | AKF55202.1        | Escherichia coli SQ37                              | 99.64        | 0.0        |     |       |
| 656408.ECPG_02507   | AKF59342.1        | Escherichia coli SQ88                              | 99.64        | 0.0        |     |       |
| 656408.ECPG_02507   | AKF63480.1        | Escherichia coli SQ110                             | 99.64        | 0.0        |     |       |
| 656408.ECPG_02507   | AKF67620.1        | Escherichia coli SQ171                             | 99.64        | 0.0        |     |       |
| 656408.ECPG_02507   | AKF71760.1        | Escherichia coli SQ2203                            | 99.64        | 0.0        |     |       |
| 656408.ECPG_02507   | AKH26758.1        | Escherichia coli CFSAN029787                       | 99.82        | 0.0        |     |       |
| 656408.ECPG_02507   | AKK12937.1        | Escherichia coli GM4792                            | 99.64        | 0.0        |     |       |
| 656408.ECPG_02507   | AKK17468.1        | Escherichia coli GM4792                            | 99.64        | 0.0        |     |       |
| 656408.ECPG_02507   | AKN47429.1        | Escherichia coli C43(DE3)                          | 99.82        | 0.0        |     |       |
| 656408.ECPG_02507   | AKO56862.1        | Escherichia coli NCM3722                           | 99.64        | 0.0        |     |       |
| 656408.ECPG_02507   | AKP84048.1        | Escherichia coli ACN001                            | 99.82        | 0.0        |     |       |
| 656408.ECPG_02507   | AKR20224.1        | Escherichia coli DH1Ec095                          | 99.64        | 0.0        |     |       |
| 656408.ECPG_02507   | <b>AKR24578.1</b> | <b>Escherichia coli DH1Ec104</b>                   | <b>99.64</b> | <b>0.0</b> |     |       |
| 656408.ECPG_02507   | AKR28981.1        | Escherichia coli DH1Ec169                          | 99.64        | 0.0        |     |       |
| 656408.ECPG_02507   | ALB31471.1        | Escherichia coli RRI                               | 99.64        | 0.0        |     |       |
| 656408.ECPG_02507   | ALI45309.1        | Escherichia coli K-12                              | 99.64        | 0.0        |     |       |
| 656408.ECPG_02507   | ALL93591.1        | Escherichia coli 2012C-4227                        | 99.64        | 0.0        |     |       |
| 656408.ECPG_02507   | ALN45422.1        | Escherichia coli YD786                             | 99.82        | 0.0        |     |       |
| 656408.ECPG_02507   | ALQ59522.1        | Escherichia coli RS76                              | 99.82        | 0.0        |     |       |
| 656408.ECPG_02507   | ALQ72912.1        | Escherichia coli CQSW20                            | 99.64        | 0.0        |     |       |
| 656408.ECPG_02507   | ALY13167.1        | Escherichia coli ACN002                            | 99.82        | 0.0        |     |       |
| 656408.ECPG_02507   | ALZ55843.1        | Shigella sonnei FORC_011                           | 98.84        | 0.0        |     |       |
| 656408.ECPG_02507   | AMB54552.1        | Escherichia coli MRE600                            | 97.85        | 0.0        |     |       |
| 656408.ECPG_02507   | AMH22195.1        | Escherichia coli B C2566                           | 99.82        | 0.0        |     |       |
| 656408.ECPG_02507   | AMH26506.1        | Escherichia coli B C3029                           | 99.82        | 0.0        |     |       |
| 656408.ECPG_02507   | AMH30021.1        | Escherichia coli K-12 DHB4                         | 99.64        | 0.0        |     |       |
| 656408.ECPG_02507   | AMH34744.1        | Escherichia coli K-12 C3026                        | 99.64        | 0.0        |     |       |
| 656408.ECPG_02507   | AML02098.1        | Escherichia coli str. K-12 substr. MG1655 JW5437-1 | 99.64        | 0.0        |     |       |
| 656408.ECPG_02507   | AMR23057.1        | Shigella sp. PAMC 28760                            | 99.82        | 0.0        |     |       |
| 656408.ECPG_02507   | AMU81991.1        | Escherichia coli 2011C-3911                        | 99.82        | 0.0        |     |       |
| 656408.ECPG_02507   | ANE62009.1        | Escherichia coli 2011C-3911                        | 99.11        | 0.0        |     |       |
| 656408.ECPG_02507   | ANJ35016.1        | Escherichia coli S51                               | 100.00       | 0.0        |     |       |
| 656408.ECPG_02507   | ANK09557.1        | Escherichia coli ER1821R                           | 99.64        | 0.0        |     |       |
| 656408.ECPG_02507   | ANO29894.1        | Escherichia coli EC590                             | 99.82        | 0.0        |     |       |
| 656408.ECPG_02507   | ANO77677.1        | Escherichia coli GB089                             | 100.00       | 0.0        |     |       |
| 656408.ECPG_02507   | ANP07066.1        | Escherichia coli 08-00022                          | 99.28        | 0.0        |     |       |

|                   |            |                                       |        |     |
|-------------------|------------|---------------------------------------|--------|-----|
| 656408.ECPG_02507 | ANP17771.1 | Escherichia coli 09-00049             | 99.82  | 0.0 |
| 656408.ECPG_02507 | ANP32306.1 | Escherichia coli H1827/12             | 99.82  | 0.0 |
| 656408.ECPG_02507 | ANQ00649.1 | Escherichia coli 210205630            | 100.00 | 0.0 |
| 656408.ECPG_02507 | ANW27520.1 | Escherichia coli O177:H21             | 99.82  | 0.0 |
| 656408.ECPG_02507 | AOM53099.1 | Escherichia coli CFSAN004176          | 99.64  | 0.0 |
| 656408.ECPG_02507 | AOO69629.1 | Escherichia coli K-12 NEB 5-alpha     | 99.64  | 0.0 |
| 656408.ECPG_02507 | AOR19630.1 | Escherichia coli 210221272            | 99.64  | 0.0 |
| 656408.ECPG_02507 | AOT33124.1 | Escherichia coli FORC_031             | 99.64  | 0.0 |
| 656408.ECPG_02507 | APA26551.1 | Escherichia coli Y5                   | 99.82  | 0.0 |
| 656408.ECPG_02507 | APES3176.1 | Escherichia coli MRSN352231           | 99.82  | 0.0 |
| 656408.ECPG_02507 | APES8124.1 | Escherichia coli MRSN346595           | 99.82  | 0.0 |
| 656408.ECPG_02507 | AP663001.1 | Escherichia coli MRSN346638           | 99.82  | 0.0 |
| 656408.ECPG_02507 | AP667843.1 | Escherichia coli MRSN346355           | 99.82  | 0.0 |
| 656408.ECPG_02507 | AP680249.1 | Escherichia coli FORC_029             | 99.82  | 0.0 |
| 656408.ECPG_02507 | AP92312.1  | Escherichia coli FORC_041             | 99.61  | 0.0 |
| 656408.ECPG_02507 | AP92313.1  | Escherichia coli FORC_041             | 99.99  | 0.0 |
| 656408.ECPG_02507 | APG36669.1 | Escherichia coli FMU073332            | 99.64  | 0.0 |
| 656408.ECPG_02507 | APJ61492.1 | Escherichia coli C2                   | 99.82  | 0.0 |
| 656408.ECPG_02507 | APJ69456.1 | Escherichia coli C3                   | 99.64  | 0.0 |
| 656408.ECPG_02507 | APJ77690.1 | Escherichia coli C5                   | 99.64  | 0.0 |
| 656408.ECPG_02507 | APJ81920.1 | Escherichia coli C8                   | 99.82  | 0.0 |
| 656408.ECPG_02507 | APJ87378.1 | Escherichia coli C9                   | 99.82  | 0.0 |
| 656408.ECPG_02507 | APJ92237.1 | Escherichia coli C10                  | 99.82  | 0.0 |
| 656408.ECPG_02507 | APJ98662.1 | Escherichia coli C11                  | 99.82  | 0.0 |
| 656408.ECPG_02507 | APJ99361.1 | Escherichia coli D1                   | 99.64  | 0.0 |
| 656408.ECPG_02507 | APK06589.1 | Escherichia coli D2                   | 99.64  | 0.0 |
| 656408.ECPG_02507 | APK10471.1 | Escherichia coli D3                   | 99.82  | 0.0 |
| 656408.ECPG_02507 | APK15391.1 | Escherichia coli D4                   | 99.82  | 0.0 |
| 656408.ECPG_02507 | APK27921.1 | Escherichia coli D7                   | 99.82  | 0.0 |
| 656408.ECPG_02507 | APK38968.1 | Escherichia coli D9                   | 99.82  | 0.0 |
| 656408.ECPG_02507 | APK50789.1 | Escherichia coli H1                   | 99.64  | 0.0 |
| 656408.ECPG_02507 | APK53684.1 | Escherichia coli H2                   | 99.64  | 0.0 |
| 656408.ECPG_02507 | APK63119.1 | Escherichia coli H5                   | 99.28  | 0.0 |
| 656408.ECPG_02507 | APK67018.1 | Escherichia coli H6                   | 99.28  | 0.0 |
| 656408.ECPG_02507 | APK69759.1 | Escherichia coli H7                   | 99.82  | 0.0 |
| 656408.ECPG_02507 | APK77345.1 | Escherichia coli H8                   | 99.82  | 0.0 |
| 656408.ECPG_02507 | APK79547.1 | Escherichia coli H10                  | 99.82  | 0.0 |
| 656408.ECPG_02507 | APK86571.1 | Escherichia coli H14                  | 99.28  | 0.0 |
| 656408.ECPG_02507 | APK88535.1 | Escherichia coli H15                  | 99.64  | 0.0 |
| 656408.ECPG_02507 | APK92226.1 | Escherichia coli M1                   | 99.82  | 0.0 |
| 656408.ECPG_02507 | APL01299.1 | Escherichia coli M3                   | 99.82  | 0.0 |
| 656408.ECPG_02507 | APL02960.1 | Escherichia coli M6                   | 99.82  | 0.0 |
| 656408.ECPG_02507 | APL10491.1 | Escherichia coli M8                   | 99.82  | 0.0 |
| 656408.ECPG_02507 | APL12745.1 | Escherichia coli M9                   | 99.82  | 0.0 |
| 656408.ECPG_02507 | APL20808.1 | Escherichia coli M10                  | 99.82  | 0.0 |
| 656408.ECPG_02507 | APL23011.1 | Escherichia coli M11                  | 99.82  | 0.0 |
| 656408.ECPG_02507 | APL28817.1 | Escherichia coli M15                  | 99.82  | 0.0 |
| 656408.ECPG_02507 | APL37862.1 | Escherichia coli M19                  | 99.82  | 0.0 |
| 656408.ECPG_02507 | APL43056.1 | Escherichia coli S1                   | 99.46  | 0.0 |
| 656408.ECPG_02507 | APL47460.1 | Escherichia coli S3                   | 99.82  | 0.0 |
| 656408.ECPG_02507 | APL53788.1 | Escherichia coli S10                  | 99.82  | 0.0 |
| 656408.ECPG_02507 | APL55360.1 | Escherichia coli S21                  | 99.28  | 0.0 |
| 656408.ECPG_02507 | APL59703.1 | Escherichia coli S30                  | 99.82  | 0.0 |
| 656408.ECPG_02507 | APL66427.1 | Escherichia coli S40                  | 99.82  | 0.0 |
| 656408.ECPG_02507 | APL70090.1 | Escherichia coli S42                  | 99.64  | 0.0 |
| 656408.ECPG_02507 | APL77498.1 | Escherichia coli S43                  | 97.14  | 0.0 |
| 656408.ECPG_02507 | APL81895.1 | Escherichia coli S50                  | 99.64  | 0.0 |
| 656408.ECPG_02507 | APL86079.1 | Escherichia coli C7                   | 99.64  | 0.0 |
| 656408.ECPG_02507 | APL91375.1 | Escherichia coli S56                  | 99.64  | 0.0 |
| 656408.ECPG_02507 | APQ21787.1 | Escherichia coli toIC                 | 99.64  | 0.0 |
| 656408.ECPG_02507 | APW94787.1 | Escherichia coli WCHEC050613          | 99.82  | 0.0 |
| 656408.ECPG_02507 | AQP91219.1 | Escherichia coli MGY                  | 99.64  | 0.0 |
| 656408.ECPG_02507 | AQT99101.1 | Escherichia coli NCTC86               | 99.64  | 0.0 |
| 656408.ECPG_02507 | AQV20769.1 | Escherichia coli Ecol_224             | 100.00 | 0.0 |
| 656408.ECPG_02507 | AQV37188.1 | Escherichia coli Ecol_422             | 99.82  | 0.0 |
| 656408.ECPG_02507 | AQV42663.1 | Escherichia coli Ecol_517             | 99.82  | 0.0 |
| 656408.ECPG_02507 | AQV79004.1 | Escherichia coli Ecol_AZ147           | 99.46  | 0.0 |
| 656408.ECPG_02507 | AQV90365.1 | Escherichia coli Ecol_AZ155           | 99.82  | 0.0 |
| 656408.ECPG_02507 | AQW72840.1 | Escherichia coli M8                   | 100.00 | 0.0 |
| 656408.ECPG_02507 | AQZ30742.1 | Escherichia coli USML2                | 99.64  | 0.0 |
| 656408.ECPG_02507 | AQZ86645.1 | Escherichia coli 13E0725              | 99.64  | 0.0 |
| 656408.ECPG_02507 | AAO2901.1  | Escherichia coli 13E0780              | 99.64  | 0.0 |
| 656408.ECPG_02507 | AAO7993.1  | Escherichia coli 13E0767              | 99.82  | 0.0 |
| 656408.ECPG_02507 | AA33529.1  | Escherichia coli AR_0069              | 99.82  | 0.0 |
| 656408.ECPG_02507 | ARD51102.1 | Escherichia coli FAM21845             | 99.64  | 0.0 |
| 656408.ECPG_02507 | ARD77010.1 | Escherichia coli BLK9                 | 99.64  | 0.0 |
| 656408.ECPG_02507 | ARD80885.1 | Escherichia coli BLK16                | 99.64  | 0.0 |
| 656408.ECPG_02507 | ARE47878.1 | Escherichia coli C                    | 99.82  | 0.0 |
| 656408.ECPG_02507 | ARH97073.1 | Escherichia coli BLR(DE3)             | 99.82  | 0.0 |
| 656408.ECPG_02507 | ARJ96202.1 | Escherichia coli CFSAN051542          | 99.82  | 0.0 |
| 656408.ECPG_02507 | ARM43182.1 | Escherichia coli HST04                | 99.64  | 0.0 |
| 656408.ECPG_02507 | ARM80105.1 | Escherichia coli HB-Coli0             | 99.64  | 0.0 |
| 656408.ECPG_02507 | ARQ26353.1 | Escherichia coli CH611_eco            | 99.82  | 0.0 |
| 656408.ECPG_02507 | ARR35427.1 | Escherichia coli 5CRE51               | 99.82  | 0.0 |
| 656408.ECPG_02507 | ARV36650.1 | Escherichia coli KSC64                | 99.82  | 0.0 |
| 656408.ECPG_02507 | ARV53085.1 | Escherichia coli 1031                 | 99.64  | 0.0 |
| 656408.ECPG_02507 | ARW87711.1 | Escherichia coli AR_0149              | 99.82  | 0.0 |
| 656408.ECPG_02507 | ARW93063.1 | Escherichia coli AR_0149              | 100.00 | 0.0 |
| 656408.ECPG_02507 | ARX14408.1 | Escherichia coli AR_0162              | 99.82  | 0.0 |
| 656408.ECPG_02507 | ARX30667.1 | Escherichia coli AR_0151              | 99.82  | 0.0 |
| 656408.ECPG_02507 | ARZ81890.1 | Escherichia coli AR_0114              | 99.82  | 0.0 |
| 656408.ECPG_02507 | ARZ90106.1 | Escherichia coli AR_0150              | 99.82  | 0.0 |
| 656408.ECPG_02507 | ASB80482.1 | Escherichia coli AR_0137              | 99.82  | 0.0 |
| 656408.ECPG_02507 | ASF02022.1 | Escherichia coli O104:H4 FDAARGOS_348 | 99.82  | 0.0 |
| 656408.ECPG_02507 | ASG49571.1 | Escherichia coli ABWA45               | 99.82  | 0.0 |
| 656408.ECPG_02507 | ASIS1133.1 | Escherichia coli FORC_043             | 99.82  | 0.0 |
| 656408.ECPG_02507 | ASJ43134.1 | Escherichia coli PSUO103              | 99.46  | 0.0 |
| 656408.ECPG_02507 | ASL31914.1 | Escherichia coli E62                  | 99.82  | 0.0 |
| 656408.ECPG_02507 | ASO00343.1 | Escherichia coli DS1                  | 99.64  | 0.0 |
| 656408.ECPG_02507 | ASO79606.1 | Escherichia coli MEM                  | 99.64  | 0.0 |
| 656408.ECPG_02507 | ASO83058.1 | Escherichia coli GE3                  | 100.00 | 0.0 |
| 656408.ECPG_02507 | ASO92563.1 | Escherichia coli WAT                  | 99.82  | 0.0 |
| 656408.ECPG_02507 | ASO66597.1 | Escherichia coli NCCP15648            | 99.82  | 0.0 |
| 656408.ECPG_02507 | ASZ41373.1 | Escherichia coli 646                  | 99.64  | 0.0 |
| 656408.ECPG_02507 | ASZ45852.1 | Escherichia coli 360/16               | 99.82  | 0.0 |
| 656408.ECPG_02507 | ATB08117.1 | Escherichia coli ETEC-2265            | 99.64  | 0.0 |
| 656408.ECPG_02507 | ATB13280.1 | Escherichia coli ETEC-2264            | 99.82  | 0.0 |
| 656408.ECPG_02507 | ATB83348.1 | Escherichia coli 1943                 | 99.82  | 0.0 |
| 656408.ECPG_02507 | ATB98198.1 | Escherichia coli 1283                 | 99.82  | 0.0 |
| 656408.ECPG_02507 | ATC03046.1 | Escherichia coli 127                  | 99.64  | 0.0 |
| 656408.ECPG_02507 | ATC07481.1 | Escherichia coli 1223                 | 99.82  | 0.0 |
| 656408.ECPG_02507 | ATG05971.1 | Escherichia coli FDAARGOS_401         | 99.82  | 0.0 |
| 656408.ECPG_02507 | ATG09919.1 | Escherichia coli FDAARGOS_403         | 99.82  | 0.0 |
| 656408.ECPG_02507 | ATM12622.1 | Escherichia coli FDAARGOS_434         | 99.82  | 0.0 |

|                   |            |                                           |        |     |
|-------------------|------------|-------------------------------------------|--------|-----|
| 656408.ECPG_02507 | ATM28720.1 | Escherichia coli FDAARGOS_433             | 99.82  | 0.0 |
| 656408.ECPG_02507 | ATO76038.1 | Escherichia coli O91 str. RM7190          | 99.82  | 0.0 |
| 656408.ECPG_02507 | ATP22263.1 | Escherichia coli UFU_EC98                 | 99.82  | 0.0 |
| 656408.ECPG_02507 | ATU35244.1 | Escherichia coli WGS                      | 99.82  | 0.0 |
| 656408.ECPG_02507 | ATW98029.1 | Escherichia coli CREC-629                 | 99.82  | 0.0 |
| 656408.ECPG_02507 | ATX07930.1 | Escherichia coli CREC-591                 | 100.00 | 0.0 |
| 656408.ECPG_02507 | ATX20314.1 | Escherichia coli CREC-532                 | 99.82  | 0.0 |
| 656408.ECPG_02507 | ATX35860.1 | Escherichia coli AMA1167                  | 99.82  | 0.0 |
| 656408.ECPG_02507 | ATX46191.1 | Escherichia coli AR_0011                  | 99.82  | 0.0 |
| 656408.ECPG_02507 | ATX50646.1 | Escherichia coli AR_0014                  | 99.82  | 0.0 |
| 656408.ECPG_02507 | ATZ30474.1 | Escherichia coli CV839-15                 | 99.28  | 0.0 |
| 656408.ECPG_02507 | ATZ37582.1 | Escherichia coli S17-13                   | 99.64  | 0.0 |
| 656408.ECPG_02507 | AUA39233.1 | Escherichia coli SC516                    | 99.64  | 0.0 |
| 656408.ECPG_02507 | AUA46387.1 | Escherichia coli S17-20                   | 99.64  | 0.0 |
| 656408.ECPG_02507 | AUF75697.1 | Escherichia coli O121:H19 16-9255         | 99.46  | 0.0 |
| 656408.ECPG_02507 | AUJ91066.1 | Escherichia coli 14EC047                  | 99.82  | 0.0 |
| 656408.ECPG_02507 | AUK01522.1 | Escherichia coli 14EC029                  | 99.82  | 0.0 |
| 656408.ECPG_02507 | AUK11801.1 | Escherichia coli 14EC017                  | 99.82  | 0.0 |
| 656408.ECPG_02507 | AUK17035.1 | Escherichia coli 14EC007                  | 99.82  | 0.0 |
| 656408.ECPG_02507 | AUL63841.1 | Escherichia coli CRE1493                  | 99.82  | 0.0 |
| 656408.ECPG_02507 | AUL70512.1 | Escherichia coli CRE1540                  | 99.82  | 0.0 |
| 656408.ECPG_02507 | AUL85442.1 | Escherichia coli SMN1975H3                | 99.64  | 0.0 |
| 656408.ECPG_02507 | AUL89883.1 | Escherichia coli SMN1525H1                | 99.64  | 0.0 |
| 656408.ECPG_02507 | AUM22805.1 | Escherichia coli SMN0135H2                | 99.64  | 0.0 |
| 656408.ECPG_02507 | AUN47905.1 | Escherichia coli SCEC020007               | 99.82  | 0.0 |
| 656408.ECPG_02507 | AUO42987.1 | Escherichia coli Ec40                     | 99.82  | 0.0 |
| 656408.ECPG_02507 | AUO57383.1 | Escherichia coli ML35                     | 99.64  | 0.0 |
| 656408.ECPG_02507 | AUP46755.1 | Escherichia coli CV839-06                 | 99.64  | 0.0 |
| 656408.ECPG_02507 | AUS38535.1 | Escherichia coli SCEC020023               | 99.82  | 0.0 |
| 656408.ECPG_02507 | AUT09483.1 | Escherichia coli DH5alpha                 | 99.64  | 0.0 |
| 656408.ECPG_02507 | AUV19787.1 | Escherichia coli ECONIH6                  | 99.82  | 0.0 |
| 656408.ECPG_02507 | AUV29619.1 | Escherichia coli ECONIH5                  | 99.82  | 0.0 |
| 656408.ECPG_02507 | AUX02823.1 | Escherichia coli FORC_042                 | 99.82  | 0.0 |
| 656408.ECPG_02507 | AUY01290.1 | Escherichia coli ECONIH4                  | 99.82  | 0.0 |
| 656408.ECPG_02507 | AUY29529.1 | Escherichia coli KBN10P04869              | 99.82  | 0.0 |
| 656408.ECPG_02507 | AVB45834.1 | Escherichia coli WCHEC005237              | 99.82  | 0.0 |
| 656408.ECPG_02507 | AVD32756.1 | Escherichia coli DTU-1                    | 99.64  | 0.0 |
| 656408.ECPG_02507 | AVL11461.1 | Escherichia coli EC11                     | 99.82  | 0.0 |
| 656408.ECPG_02507 | AVL29087.1 | Escherichia coli O104:H4 FDAARGOS_349     | 99.82  | 0.0 |
| 656408.ECPG_02507 | AVM02482.1 | Escherichia coli AS19-Rrma                | 99.82  | 0.0 |
| 656408.ECPG_02507 | AVN01481.1 | Escherichia coli WCHEC025943              | 99.82  | 0.0 |
| 656408.ECPG_02507 | AVP29638.1 | Escherichia coli RM14721                  | 99.82  | 0.0 |
| 656408.ECPG_02507 | AVR73049.1 | Escherichia coli 6755K2                   | 99.82  | 0.0 |
| 656408.ECPG_02507 | AVS05486.1 | Escherichia coli CFSAN064036              | 99.82  | 0.0 |
| 656408.ECPG_02507 | AVT63287.1 | Escherichia coli 26561                    | 99.82  | 0.0 |
| 656408.ECPG_02507 | AVT73481.1 | Escherichia coli HKUOPY1                  | 99.28  | 0.0 |
| 656408.ECPG_02507 | AVZ09629.1 | Escherichia coli WCHEC005784              | 99.41  | 0.0 |
| 656408.ECPG_02507 | AVZ48906.1 | Escherichia coli J53                      | 99.64  | 0.0 |
| 656408.ECPG_02507 | AVZ53809.1 | Escherichia coli ME8067                   | 99.64  | 0.0 |
| 656408.ECPG_02507 | AWF10404.1 | Escherichia coli AR437                    | 99.82  | 0.0 |
| 656408.ECPG_02507 | AWF22756.1 | Escherichia coli AR435                    | 99.82  | 0.0 |
| 656408.ECPG_02507 | AWF28068.1 | Escherichia coli AR434                    | 99.82  | 0.0 |
| 656408.ECPG_02507 | AWI98948.1 | Escherichia coli H9Ecoli                  | 99.82  | 0.0 |
| 656408.ECPG_02507 | AWJ26661.1 | Escherichia coli O121 str. RM8352         | 99.46  | 0.0 |
| 656408.ECPG_02507 | AWJ99602.1 | Escherichia coli ECCRA-119                | 99.82  | 0.0 |
| 656408.ECPG_02507 | AWM69948.1 | Escherichia coli VH1                      | 99.64  | 0.0 |
| 656408.ECPG_02507 | AWO21530.1 | Escherichia coli DA33133                  | 99.82  | 0.0 |
| 656408.ECPG_02507 | AWS65750.1 | Escherichia coli AR_0085                  | 99.82  | 0.0 |
| 656408.ECPG_02507 | AWU90769.1 | Escherichia coli HS30-1                   | 100.00 | 0.0 |
| 656408.ECPG_02507 | AWV10789.1 | Escherichia coli 510083695K1              | 99.82  | 0.0 |
| 656408.ECPG_02507 | AWX38772.1 | Escherichia coli WCHEC035148              | 99.82  | 0.0 |
| 656408.ECPG_02507 | AWY88767.1 | Escherichia coli                          | 99.82  | 0.0 |
| 656408.ECPG_02507 | AWZ68329.1 | Escherichia coli AR_452                   | 99.82  | 0.0 |
| 656408.ECPG_02507 | AXA08721.1 | Escherichia coli RTdeIA_B_UU3             | 99.64  | 0.0 |
| 656408.ECPG_02507 | AXE57637.1 | Escherichia coli AMSHX01                  | 99.82  | 0.0 |
| 656408.ECPG_02507 | AXI35675.1 | Escherichia coli FORC_064                 | 99.64  | 0.0 |
| 656408.ECPG_02507 | AXL03900.1 | Escherichia coli ST410                    | 99.82  | 0.0 |
| 656408.ECPG_02507 | AXL18024.1 | Escherichia coli C600                     | 99.64  | 0.0 |
| 656408.ECPG_02507 | AXO06955.1 | Escherichia coli cq9                      | 99.64  | 0.0 |
| 656408.ECPG_02507 | AXP27026.1 | Escherichia coli UK_Dog_Liverpool         | 99.82  | 0.0 |
| 656408.ECPG_02507 | BAA14886.1 | Escherichia coli str. K-12 substr. W3110  | 99.64  | 0.0 |
| 656408.ECPG_02507 | BAG76885.1 | Escherichia coli SE11                     | 99.82  | 0.0 |
| 656408.ECPG_02507 | BAI30302.1 | Escherichia coli O103:H2 str. 12009       | 99.46  | 0.0 |
| 656408.ECPG_02507 | BAL38373.1 | Escherichia coli str. K-12 substr. MD542  | 99.64  | 0.0 |
| 656408.ECPG_02507 | CAQ31814.2 | Escherichia coli BL21(DE3)                | 99.82  | 0.0 |
| 656408.ECPG_02507 | CAQ98193.1 | Escherichia coli IAI1                     | 99.82  | 0.0 |
| 656408.ECPG_02507 | CAU97329.1 | Escherichia coli 55989                    | 99.82  | 0.0 |
| 656408.ECPG_02507 | CBJ00916.1 | Escherichia coli ETEC H10407              | 99.64  | 0.0 |
| 656408.ECPG_02507 | CCQ28508.2 | Escherichia coli HUSEC2011                | 99.82  | 0.0 |
| 656408.ECPG_02507 | CDJ71725.1 | Escherichia coli str. K-12 substr. MC4100 | 99.64  | 0.0 |
| 656408.ECPG_02507 | CDY57626.1 | Escherichia coli K-12 substr. HMS174      | 99.64  | 0.0 |
| 656408.ECPG_02507 | CDZ20139.1 | Escherichia coli K-12 substr. RV308       | 99.64  | 0.0 |
| 656408.ECPG_02507 | CQR80868.1 | Escherichia coli K-12                     | 99.64  | 0.0 |
| 656408.ECPG_02507 | CUQ96390.1 | Escherichia coli MC1061                   | 99.64  | 0.0 |
| 656408.ECPG_02507 | SCA70990.1 | Escherichia coli                          | 99.82  | 0.0 |
| 656408.ECPG_02507 | SMB29439.1 | Escherichia coli                          | 99.82  | 0.0 |
| 656408.ECPG_02507 | SMB29440.1 | Escherichia coli                          | 99.82  | 0.0 |
| 656408.ECPG_02507 | SNW13755.1 | Escherichia coli NCTC122                  | 99.82  | 0.0 |
| 656408.ECPG_02507 | SQE44352.1 | Escherichia coli NCTC9967                 | 99.60  | 0.0 |
| 656408.ECPG_02507 | SQE53724.1 | Escherichia coli NCTC11023                | 99.64  | 0.0 |
| 656419.ECJG_00789 | ADA73717.1 | Shigella flexneri 2002017                 | 97.29  | 0.0 |
| 656419.ECJG_00789 | AHG08418.1 | Escherichia coli O145:H28 str. RM13514    | 97.85  | 0.0 |
| 656419.ECJG_00789 | AHG14368.1 | Escherichia coli O145:H28 str. RM13516    | 98.03  | 0.0 |
| 656419.ECJG_00789 | AHY64705.1 | Escherichia coli O145:H28 str. RM12761    | 98.03  | 0.0 |
| 656419.ECJG_00789 | AHY70241.1 | Escherichia coli O145:H28 str. RM12581    | 97.85  | 0.0 |
| 656419.ECJG_00789 | AIL35420.1 | Shigella flexneri 2003036                 | 97.29  | 0.0 |
| 656419.ECJG_00789 | AIL40344.1 | Shigella flexneri Shi06HNO06              | 97.29  | 0.0 |
| 656419.ECJG_00789 | AJA25782.1 | Escherichia coli O157:H7 str. 5552        | 97.93  | 0.0 |
| 656419.ECJG_00789 | AKK53902.1 | Shigella flexneri G1663                   | 99.29  | 0.0 |
| 656419.ECJG_00789 | ALH90358.1 | Escherichia coli O157:H7 WS4202           | 98.85  | 0.0 |
| 656419.ECJG_00789 | AMG78620.1 | Escherichia coli O157:H7 JEONG-1266       | 98.85  | 0.0 |
| 656419.ECJG_00789 | AMW41343.1 | Escherichia coli 28RC1                    | 98.85  | 0.0 |
| 656419.ECJG_00789 | AMW51403.1 | Escherichia coli SRCC 1675                | 98.85  | 0.0 |
| 656419.ECJG_00789 | ANE67060.1 | Escherichia coli 2013C-4465               | 98.85  | 0.0 |
| 656419.ECJG_00789 | ANG68573.1 | Escherichia coli O157:H7 FRIK2533         | 98.85  | 0.0 |
| 656419.ECJG_00789 | ANG74072.1 | Escherichia coli O157:H7 FRIK2455         | 98.85  | 0.0 |
| 656419.ECJG_00789 | ANG79620.1 | Escherichia coli O157:H7 FRIK2069         | 98.85  | 0.0 |
| 656419.ECJG_00789 | ANW39980.1 | Escherichia coli O157:H7 FRIK944          | 98.85  | 0.0 |
| 656419.ECJG_00789 | AOD11513.1 | Escherichia coli EDL933-1                 | 98.85  | 0.0 |
| 656419.ECJG_00789 | AOV21776.1 | Escherichia coli O157:H7 1130             | 98.85  | 0.0 |
| 656419.ECJG_00789 | AOV27319.1 | Escherichia coli O157:H7 2149             | 98.85  | 0.0 |
| 656419.ECJG_00789 | AOV32674.1 | Escherichia coli O157:H7 2159             | 98.85  | 0.0 |
| 656419.ECJG_00789 | AOV38022.1 | Escherichia coli O157:H7 3384             | 98.85  | 0.0 |
| 656419.ECJG_00789 | AOV43260.1 | Escherichia coli O157:H7 4276             | 98.85  | 0.0 |

|                      |             |                                                            |        |     |    |      |             |
|----------------------|-------------|------------------------------------------------------------|--------|-----|----|------|-------------|
| 656419.ECJG_00789    | AOV48778.1  | Escherichia coli O157:H7 8368                              | 98.85  | 0.0 |    |      |             |
| 656419.ECJG_00789    | AOV54206.1  | Escherichia coli O157:H7 9234                              | 98.85  | 0.0 |    |      |             |
| 656419.ECJG_00789    | AOX52692.1  | Escherichia coli NADC 5570/86-24/6565                      | 98.85  | 0.0 |    |      |             |
| 656419.ECJG_00789    | AOX58085.1  | Escherichia coli NADC 5570/86-24/6564                      | 98.85  | 0.0 |    |      |             |
| 656419.ECJG_00789    | APA42687.1  | Escherichia coli PA20                                      | 98.85  | 0.0 |    |      |             |
| 656419.ECJG_00789    | APH98020.1  | Escherichia coli 155                                       | 98.85  | 0.0 |    |      |             |
| 656419.ECJG_00789    | API03650.1  | Escherichia coli 272                                       | 98.85  | 0.0 |    |      |             |
| 656419.ECJG_00789    | API09485.1  | Escherichia coli 319                                       | 98.85  | 0.0 |    |      |             |
| 656419.ECJG_00789    | API14993.1  | Escherichia coli 350                                       | 98.85  | 0.0 |    |      |             |
| 656419.ECJG_00789    | API20171.1  | Escherichia coli 472                                       | 98.85  | 0.0 |    |      |             |
| 656419.ECJG_00789    | API26070.1  | Escherichia coli 7784                                      | 98.85  | 0.0 |    |      |             |
| 656419.ECJG_00789    | API31530.1  | Escherichia coli 9000                                      | 98.85  | 0.0 |    |      |             |
| 656419.ECJG_00789    | API37310.1  | Escherichia coli 10671                                     | 98.85  | 0.0 |    |      |             |
| 656419.ECJG_00789    | APK57915.1  | Escherichia coli H3                                        | 95.89  | 0.0 |    |      |             |
| 656419.ECJG_00789    | AQZ77746.1  | Escherichia coli DSM 103246                                | 99.11  | 0.0 |    |      |             |
| 656419.ECJG_00789    | ARA15751.1  | Escherichia coli AR_0118                                   | 95.89  | 0.0 |    |      |             |
| 656419.ECJG_00789    | ARV31842.1  | Escherichia coli 9                                         | 95.89  | 0.0 |    |      |             |
| 656419.ECJG_00789    | ARV50990.1  | Escherichia coli 207                                       | 94.96  | 0.0 |    |      |             |
| 656419.ECJG_00789    | ARX56851.1  | Escherichia coli AR_0128                                   | 95.89  | 0.0 |    |      |             |
| 656419.ECJG_00789    | ASE50280.1  | Escherichia coli O157 FDAARGOS_293                         | 98.85  | 0.0 |    |      |             |
| 656419.ECJG_00789    | ASL59332.1  | Escherichia coli FORC_044                                  | 98.85  | 0.0 |    |      |             |
| 656419.ECJG_00789    | ASQ53003.1  | Shigella flexneri 4c 1602                                  | 97.29  | 0.0 |    |      |             |
| 656419.ECJG_00789    | ASQ56830.1  | Shigella flexneri 4c 0702                                  | 97.29  | 0.0 |    |      |             |
| 656419.ECJG_00789    | ASQ63642.1  | Shigella flexneri 1a 0439                                  | 97.29  | 0.0 |    |      |             |
| 656419.ECJG_00789    | ASQ82301.1  | Shigella flexneri 1a 0670                                  | 97.29  | 0.0 |    |      |             |
| 656419.ECJG_00789    | AST66394.1  | Escherichia coli CDC#03-98                                 | 98.85  | 0.0 |    |      |             |
| 656419.ECJG_00789    | ATH67736.1  | Shigella flexneri 1c Y394                                  | 97.02  | 0.0 |    |      |             |
| 656419.ECJG_00789    | AJWJ05203.1 | Escherichia coli H8Ecoli                                   | 95.89  | 0.0 |    |      |             |
| 656419.ECJG_00789    | AJWJ48644.1 | Escherichia coli O43 str. RM10042                          | 95.89  | 0.0 |    |      |             |
| 656419.ECJG_00789    | AJWN68744.1 | Escherichia coli RM10466                                   | 95.89  | 0.0 |    |      |             |
| 656419.ECJG_00789    | AJWN77593.1 | Escherichia coli O145 str. RM9872                          | 97.85  | 0.0 |    |      |             |
| 656419.ECJG_00789    | AXC56685.1  | Shigella flexneri 2a 1508                                  | 97.35  | 0.0 |    |      |             |
| 656419.ECJG_00789    | AXF72144.1  | Escherichia coli AMSCJX02                                  | 95.89  | 0.0 |    |      |             |
| 656419.ECJG_00789    | BAB35310.1  | Escherichia coli O157:H7 str. Sakai                        | 98.47  | 0.0 |    |      |             |
| 656419.ECJG_00789    | CDX06624.1  | Shigella flexneri                                          | 97.29  | 0.0 |    |      |             |
| 656419.ECJG_00789    | NP_287879.1 | Escherichia coli O157:H7 str. EDL933                       | 98.75  | 0.0 |    |      |             |
| V1.UC21-4_GL0152588  | AIE64133.1  | Enterobacter cloacae ECNIH2                                | 99.11  | 0.0 | 55 | 4.34 | 1.40184e-05 |
| V1.UC21-4_GL0152588  | AJB63082.1  | Enterobacter hormaechei subsp. steigerwaltii 34977         | 98.94  | 0.0 |    |      |             |
| V1.UC21-4_GL0152588  | AJB71207.1  | Enterobacter hormaechei subsp. hormaechei 34983            | 96.28  | 0.0 |    |      |             |
| V1.UC21-4_GL0152588  | AJB82057.1  | Enterobacter hormaechei subsp. oharae 34399                | 96.64  | 0.0 |    |      |             |
| V1.UC21-4_GL0152588  | AKK79395.1  | Enterobacter cloacae CAV1311                               | 99.11  | 0.0 |    |      |             |
| V1.UC21-4_GL0152588  | AKK92438.1  | Enterobacter cloacae CAV1411                               | 99.11  | 0.0 |    |      |             |
| V1.UC21-4_GL0152588  | AKK96411.1  | Enterobacter cloacae CAV1668                               | 99.11  | 0.0 |    |      |             |
| V1.UC21-4_GL0152588  | AKL51780.1  | Enterobacter cloacae CAV1669                               | 99.11  | 0.0 |    |      |             |
| V1.UC21-4_GL0152588  | AKZ84479.1  | Enterobacter hormaechei subsp. steigerwaltii 34998         | 99.12  | 0.0 |    |      |             |
| V1.UC21-4_GL0152588  | ALA02383.1  | Enterobacter hormaechei subsp. oharae 34978                | 96.81  | 0.0 |    |      |             |
| V1.UC21-4_GL0152588  | ALV83403.1  | Enterobacter cloacae G6809                                 | 98.05  | 0.0 |    |      |             |
| V1.UC21-4_GL0152588  | ANS17569.1  | Enterobacter hormaechei CAV1176                            | 99.11  | 0.0 |    |      |             |
| V1.UC21-4_GL0152588  | AOP78264.1  | Enterobacter hormaechei subsp. steigerwaltii DSM 16691     | 99.29  | 0.0 |    |      |             |
| V1.UC21-4_GL0152588  | AOP83094.1  | Enterobacter hormaechei subsp. oharae DSM 16687            | 98.41  | 0.0 |    |      |             |
| V1.UC21-4_GL0152588  | AOP91594.1  | Enterobacter hormaechei subsp. xiangfangensis LMG27195     | 96.99  | 0.0 |    |      |             |
| V1.UC21-4_GL0152588  | APRA1473.1  | Enterobacter cloacae AR_0002                               | 96.81  | 0.0 |    |      |             |
| V1.UC21-4_GL0152588  | ARA29483.1  | Enterobacter cloacae AR_0065                               | 99.82  | 0.0 |    |      |             |
| V1.UC21-4_GL0152588  | ARZ81273.1  | Enterobacter cloacae AR_0163                               | 98.05  | 0.0 |    |      |             |
| V1.UC21-4_GL0152588  | ASA06867.1  | Enterobacter cloacae AR_0053                               | 96.61  | 0.0 |    |      |             |
| V1.UC21-4_GL0152588  | ASB82762.1  | Enterobacter cloacae AR_0136                               | 96.81  | 0.0 |    |      |             |
| V1.UC21-4_GL0152588  | ASP02050.1  | Enterobacter cloacae M57884A                               | 99.47  | 0.0 |    |      |             |
| V1.UC21-4_GL0152588  | ATW92927.1  | Enterobacter sp. CRENT-193                                 | 96.64  | 0.0 |    |      |             |
| V1.UC21-4_GL0152588  | AVE75308.1  | Enterobacter cloacae AR_0060                               | 98.41  | 0.0 |    |      |             |
| V1.UC21-4_GL0152588  | AVF15456.1  | Enterobacter cloacae AR_0072                               | 98.41  | 0.0 |    |      |             |
| V1.UC21-4_GL0152588  | AVO84011.1  | Enterobacter cloacae AR_0093                               | 96.64  | 0.0 |    |      |             |
| V1.UC21-4_GL0152588  | AWF30692.1  | Enterobacter hormaechei AR432                              | 98.75  | 0.0 |    |      |             |
| V1.UC21-4_GL0152588  | AWQ43752.1  | Enterobacter cloacae 234                                   | 97.35  | 0.0 |    |      |             |
| V1.UC21-4_GL0152588  | AWQ57964.1  | Enterobacter cloacae 388                                   | 97.35  | 0.0 |    |      |             |
| V1.UC21-4_GL0152588  | AWR68818.1  | Enterobacter hormaechei subsp. xiangfangensis OSUKPC4_L    | 96.81  | 0.0 |    |      |             |
| V1.UC21-4_GL0152588  | AW577924.1  | Enterobacter cloacae AR_0154                               | 99.12  | 0.0 |    |      |             |
| V1.UC21-4_GL0152588  | AWV76028.1  | Enterobacter hormaechei subsp. xiangfangensis Pb204        | 99.47  | 0.0 |    |      |             |
| V1.UC21-4_GL0152588  | AWX04181.1  | Enterobacter cloacae 20710                                 | 96.99  | 0.0 |    |      |             |
| V1.UC21-4_GL0152588  | AWZ97512.1  | Enterobacter cloacae AR_038                                | 99.11  | 0.0 |    |      |             |
| V1.UC21-4_GL0152588  | AXL99615.1  | Enterobacter hormaechei subsp. xiangfangensis OSUVMCKPC4-2 | 96.81  | 0.0 |    |      |             |
| V1.UC21-4_GL0152588  | AXO40336.1  | Enterobacter hormaechei S5                                 | 98.76  | 0.0 |    |      |             |
| V1.UC21-4_GL0152588  | AXO47083.1  | Enterobacter hormaechei S13                                | 99.12  | 0.0 |    |      |             |
| V1.UC21-4_GL0152588  | AXO51547.1  | Enterobacter hormaechei S6                                 | 99.12  | 0.0 |    |      |             |
| V1.UC21-4_GL0152588  | AXQ33045.1  | Enterobacter hormaechei WCHEH020038                        | 97.17  | 0.0 |    |      |             |
| V1.UC21-4_GL0152588  | SMF92936.1  | Enterobacter cloacae DGG                                   | 99.65  | 0.0 |    |      |             |
| DOM005_GL0051693     | AIN22928.1  | Enterobacter hormaechei subsp. hoffmannii ECNIH3           | 99.29  | 0.0 | 30 | 2.37 | 1.62598e-05 |
| DOM005_GL0051693     | AIN28266.1  | Enterobacter hormaechei subsp. hoffmannii ECR091           | 99.29  | 0.0 |    |      |             |
| DOM005_GL0051693     | AIX59123.1  | Enterobacter cloacae ECNIH5                                | 99.29  | 0.0 |    |      |             |
| DOM005_GL0051693     | AOQ00148.1  | Enterobacter hormaechei subsp. hoffmannii DSM 14563        | 99.65  | 0.0 |    |      |             |
| DOM005_GL0051693     | ASB75288.1  | Enterobacter cloacae AR_0050                               | 98.94  | 0.0 |    |      |             |
| DOM005_GL0051693     | AVJ80092.1  | Enterobacter hormaechei subsp. hoffmannii AR_0365          | 99.64  | 0.0 |    |      |             |
| DOM005_GL0051693     | AVZ14557.1  | Enterobacter hormaechei SCEH020042                         | 98.82  | 0.0 |    |      |             |
| T2D-108A_GL0194913   | AFM60203.1  | Enterobacter cloacae subsp. dissolvens SDM                 | 98.57  | 0.0 | 5  | 0.39 | 1.70435e-05 |
| 1045856.EcWSU1_02474 | AEW73909.1  | Enterobacter cloacae EcWSU1                                | 100.00 | 0.0 | 16 | 1.26 | 2.37877e-06 |
| 1045856.EcWSU1_02474 | AHE70389.1  | Enterobacter cloacae P101                                  | 98.93  | 0.0 |    |      |             |
| 1045856.EcWSU1_02474 | AKM87790.1  | Enterobacter cloacae UWS                                   | 99.12  | 0.0 |    |      |             |
| 1045856.EcWSU1_02474 | AOT43270.1  | Enterobacter ludwigii EN-119                               | 99.47  | 0.0 |    |      |             |
| 1045856.EcWSU1_02474 | AVR02658.1  | Enterobacter cloacae complex sp. FDA-CDC-AR_0132           | 99.47  | 0.0 |    |      |             |
| 1045856.EcWSU1_02474 | AWC86281.1  | Enterobacter cloacae complex sp. FDA-CDC-AR_0164           | 99.65  | 0.0 |    |      |             |
| MH0179_GL0059381     | AKL16517.1  | Citrobacter freundii CAV1321                               | 90.16  | 0.0 | 11 | 0.87 | 4.58739e-06 |
| MH0179_GL0059381     | AKL55249.1  | Citrobacter freundii CAV1741                               | 90.16  | 0.0 |    |      |             |
| MH0179_GL0059381     | ANZ87250.1  | Citrobacter freundii B38                                   | 90.71  | 0.0 |    |      |             |
| MH0179_GL0059381     | AOI31289.1  | Citrobacter freundii SL151                                 | 90.36  | 0.0 |    |      |             |
| MH0179_GL0059381     | APR33611.1  | Citrobacter freundii BD                                    | 91.09  | 0.0 |    |      |             |
| MH0179_GL0059381     | ARC40160.1  | Citrobacter braakii FDAARGOS_253                           | 90.73  | 0.0 |    |      |             |
| MH0179_GL0059381     | ASE41675.1  | Citrobacter braakii FDAARGOS_290                           | 91.27  | 0.0 |    |      |             |
| MH0179_GL0059381     | ASG44264.1  | Citrobacter freundii 7055K3                                | 90.71  | 0.0 |    |      |             |
| MH0179_GL0059381     | ASJ99159.1  | Citrobacter freundii 18-1                                  | 90.71  | 0.0 |    |      |             |
| MH0179_GL0059381     | ATX02905.1  | Citrobacter freundii CRCB-101                              | 91.09  | 0.0 |    |      |             |
| MH0179_GL0059381     | AUT96960.1  | Citrobacter freundii FDAARGOS_61                           | 90.73  | 0.0 |    |      |             |
| MH0179_GL0059381     | AUV26158.1  | Citrobacter freundii complex sp. CFNIH3                    | 91.27  | 0.0 |    |      |             |
| MH0179_GL0059381     | AUZ69639.1  | Citrobacter freundii complex sp. CFNIH4                    | 90.36  | 0.0 |    |      |             |
| MH0179_GL0059381     | AVQ89635.1  | Citrobacter freundii B9-C2                                 | 90.36  | 0.0 |    |      |             |
| MH0179_GL0059381     | AW596803.1  | Citrobacter sp. CRE-46 AR_0156                             | 96.44  | 0.0 |    |      |             |
| MH0179_GL0059381     | BBA25990.1  | Enterobacter hormaechei TUM11043                           | 90.87  | 0.0 |    |      |             |
| MH0277_GL0009193     | AAQ45175.1  | Enterococcus faecium                                       | 99.47  | 0.0 | 47 | 3.71 | 1.82128e-05 |
| MH0277_GL0009193     | AFC64909.1  | Enterococcus faecium Aus0004                               | 99.47  | 0.0 |    |      |             |
| MH0277_GL0009193     | AFK60287.1  | Enterococcus faecium DO                                    | 99.47  | 0.0 |    |      |             |
| MH0277_GL0009193     | AGE31270.1  | Enterococcus faecium NRRL B-2354                           | 99.64  | 0.0 |    |      |             |
| MH0277_GL0009193     | AGS76839.1  | Enterococcus faecium Aus0085                               | 99.29  | 0.0 |    |      |             |
| MH0277_GL0009193     | AIH40086.1  | Enterococcus faecium T110                                  | 98.40  | 0.0 |    |      |             |
| MH0277_GL0009193     | ALF49749.1  | Enterococcus faecium 64/3                                  | 99.47  | 0.0 |    |      |             |
| MH0277_GL0009193     | ALLO9020.1  | Enterococcus faecium UW7606x64/3 TC1                       | 99.47  | 0.0 |    |      |             |
| MH0277_GL0009193     | ALZ53339.1  | Enterococcus faecium 6E6                                   | 99.29  | 0.0 |    |      |             |

|                     |              |                                                     |        |     |     |       |             |
|---------------------|--------------|-----------------------------------------------------|--------|-----|-----|-------|-------------|
| MH0277_GL0009193    | AMP60108.1   | Enterococcus faecium UW8175                         | 100.00 | 0.0 |     |       |             |
| MH0277_GL0009193    | AMQ98417.1   | Enterococcus faecium ATCC 700221                    | 99.47  | 0.0 |     |       |             |
| MH0277_GL0009193    | ANB95031.1   | Enterococcus faecium E39                            | 99.47  | 0.0 |     |       |             |
| MH0277_GL0009193    | AOM17049.1   | Enterococcus faecium ISMMS_VRE_1                    | 99.47  | 0.0 |     |       |             |
| MH0277_GL0009193    | AOM17857.1   | Enterococcus faecium ISMMS_VRE_2                    | 99.47  | 0.0 |     |       |             |
| MH0277_GL0009193    | AOM22256.1   | Enterococcus faecium ISMMS_VRE_3                    | 99.47  | 0.0 |     |       |             |
| MH0277_GL0009193    | AOM26458.1   | Enterococcus faecium ISMMS_VRE_4                    | 99.47  | 0.0 |     |       |             |
| MH0277_GL0009193    | AOM27204.1   | Enterococcus faecium ISMMS_VRE_5                    | 99.47  | 0.0 |     |       |             |
| MH0277_GL0009193    | AOM32025.1   | Enterococcus faecium ISMMS_VRE_7                    | 99.47  | 0.0 |     |       |             |
| MH0277_GL0009193    | AOM34008.1   | Enterococcus faecium ISMMS_VRE_8                    | 99.47  | 0.0 |     |       |             |
| MH0277_GL0009193    | AOM38253.1   | Enterococcus faecium ISMMS_VRE_10                   | 99.47  | 0.0 |     |       |             |
| MH0277_GL0009193    | AON59726.1   | Enterococcus faecium ISMMS_VRE_11                   | 99.47  | 0.0 |     |       |             |
| MH0277_GL0009193    | AOT79967.1   | Enterococcus faecium E745                           | 99.47  | 0.0 |     |       |             |
| MH0277_GL0009193    | APJ07632.1   | Enterococcus faecium VRE001                         | 99.47  | 0.0 |     |       |             |
| MH0277_GL0009193    | APV55597.1   | Enterococcus faecium ISMMS_VRE_12                   | 99.47  | 0.0 |     |       |             |
| MH0277_GL0009193    | APV58385.1   | Enterococcus faecium ISMMS_VRE_9                    | 99.47  | 0.0 |     |       |             |
| MH0277_GL0009193    | AQT57736.1   | Enterococcus faecium VREF                           | 99.29  | 0.0 |     |       |             |
| MH0277_GL0009193    | AQY29852.1   | Enterococcus faecium isolate 2014-VREF-63           | 99.29  | 0.0 |     |       |             |
| MH0277_GL0009193    | AQY31370.1   | Enterococcus faecium isolate 2014-VREF-268          | 99.47  | 0.0 |     |       |             |
| MH0277_GL0009193    | ATD79535.1   | Enterococcus faecium K60-39                         | 99.29  | 0.0 |     |       |             |
| MH0277_GL0009193    | ATU01452.1   | Enterococcus faecium E240                           | 99.47  | 0.0 |     |       |             |
| MH0277_GL0009193    | ATU04043.1   | Enterococcus faecium E243                           | 99.47  | 0.0 |     |       |             |
| MH0277_GL0009193    | ATU30587.1   | Enterococcus faecium 16-346                         | 99.29  | 0.0 |     |       |             |
| MH0277_GL0009193    | ATW37429.1   | Enterococcus faecium E232                           | 99.47  | 0.0 |     |       |             |
| MH0277_GL0009193    | AUC71705.1   | Enterococcus faecium LS170308                       | 100.00 | 0.0 |     |       |             |
| MH0277_GL0009193    | AUH48806.1   | Enterococcus faecium SC4                            | 99.29  | 0.0 |     |       |             |
| MH0277_GL0009193    | AUI19932.1   | Enterococcus faecium Efaecium_ER04120.3A            | 99.47  | 0.0 |     |       |             |
| MH0277_GL0009193    | AUI22901.1   | Enterococcus faecium Efaecium_ER04462.3A            | 99.47  | 0.0 |     |       |             |
| MH0277_GL0009193    | AUI25875.1   | Enterococcus faecium Efaecium_ER04484.3A            | 99.47  | 0.0 |     |       |             |
| MH0277_GL0009193    | AUI28849.1   | Enterococcus faecium Efaecium_ER04526.5A            | 99.47  | 0.0 |     |       |             |
| MH0277_GL0009193    | AUI34755.1   | Enterococcus faecium Efaecium_ER04526.3A            | 99.47  | 0.0 |     |       |             |
| MH0277_GL0009193    | AUJ66970.1   | Enterococcus faecium WEFA23                         | 98.57  | 0.0 |     |       |             |
| MH0277_GL0009193    | AV43734.1    | Enterococcus faecium 13-009                         | 99.47  | 0.0 |     |       |             |
| MH0277_GL0009193    | AVL45788.1   | Enterococcus faecium FDAARGOS_323                   | 99.47  | 0.0 |     |       |             |
| MH0277_GL0009193    | AWV59697.1   | Enterococcus faecium CFSAN059070                    | 99.29  | 0.0 |     |       |             |
| MH0277_GL0009193    | AWV62719.1   | Enterococcus faecium CFSAN059071                    | 99.29  | 0.0 |     |       |             |
| MH0277_GL0009193    | CUX99927.1   | Enterococcus faecium                                | 97.15  | 0.0 |     |       |             |
| 716541.ECL_01780    | ADF61338.1   | Enterobacter cloacae subsp. cloacae ATCC 13047      | 100.00 | 0.0 | 35  | 2.76  | 3.2226e-06  |
| 716541.ECL_01780    | AIV29987.1   | Enterobacter cloacae GGT036                         | 98.57  | 0.0 |     |       |             |
| 716541.ECL_01780    | AOE95760.1   | Enterobacter cloacae isolate SBP-8                  | 98.57  | 0.0 |     |       |             |
| 716541.ECL_01780    | ASQ18263.1   | Enterobacter cloacae M12X01451                      | 98.75  | 0.0 |     |       |             |
| 716541.ECL_01780    | AVL18876.1   | Enterobacter cloacae Res2010EC27                    | 98.04  | 0.0 |     |       |             |
| MH0425_GL0086260    | AKL19332.1   | Citrobacter freundii CAV1321                        | 99.28  | 0.0 | 41  | 3.24  | 3.84945e-06 |
| MH0425_GL0086260    | AKL56772.1   | Citrobacter freundii CAV1741                        | 99.28  | 0.0 |     |       |             |
| MH0425_GL0086260    | ASG46280.1   | Citrobacter freundii 7055K3                         | 99.64  | 0.0 |     |       |             |
| MH0425_GL0086260    | AVQ90950.1   | Citrobacter freundii B9-C2                          | 99.09  | 0.0 |     |       |             |
| MH0126_GL0034640    | WP_008399816 | Clostridium sp. L2-50                               | 98.35  | 0.0 | 376 | 29.68 | 0.000548039 |
| MH0003_GL0082004    | AEH55776.1   | Streptococcus parasanguinis ATCC 15912              | 99.38  | 0.0 | 319 | 25.18 | 3.66166e-05 |
| MH0003_GL0082004    | AFJ26298.1   | Streptococcus parasanguinis FW213                   | 98.57  | 0.0 |     |       |             |
| MH0193_GL0146584    | AAN24362.1   | Bifidobacterium longum NCC2705                      | 98.62  | 0.0 | 561 | 44.28 | 0.000161452 |
| MH0193_GL0146584    | AAO84039.1   | Bifidobacterium longum SJ32                         | 99.21  | 0.0 |     |       |             |
| MH0193_GL0146584    | AEI98364.1   | Bifidobacterium longum subsp. longum KACC 91563     | 99.02  | 0.0 |     |       |             |
| MH0193_GL0146584    | AOL09592.1   | Bifidobacterium longum 35624                        | 99.02  | 0.0 |     |       |             |
| MH0193_GL0146584    | AXF97810.1   | Bifidobacterium longum subsp. longum BORI           | 99.02  | 0.0 |     |       |             |
| MH0193_GL0146584    | BAF62433.1   | Bifidobacterium longum subsp. longum JCM 1217       | 98.62  | 0.0 |     |       |             |
| MH0193_GL0146584    | BAJ65776.1   | Bifidobacterium longum subsp. longum JCM 1217       | 99.02  | 0.0 |     |       |             |
| MH0193_GL0146584    | BAJ70243.1   | Bifidobacterium longum subsp. infantis 157F         | 98.82  | 0.0 |     |       |             |
| O2_UC36-0_GL0013311 | AIW43159.1   | Bifidobacterium longum subsp. longum GT15           | 99.41  | 0.0 | 681 | 53.75 | 0.000415948 |
| O2_UC36-0_GL0013311 | ALO71760.1   | Bifidobacterium longum subsp. longum NCIMB8809      | 99.61  | 0.0 |     |       |             |
| O2_UC36-0_GL0013311 | ALO73625.1   | Bifidobacterium longum subsp. longum CUG30698       | 99.41  | 0.0 |     |       |             |
| O2_UC36-0_GL0013311 | BAP82762.1   | Bifidobacterium longum 105-A                        | 99.21  | 0.0 |     |       |             |
| O2_UC36-0_GL0013311 | CBK71263.1   | Bifidobacterium longum subsp. longum F8             | 99.02  | 0.0 |     |       |             |
| DLF012_GL0007335    | ABE94812.1   | Bifidobacterium breve UCC2003                       | 99.80  | 0.0 | 200 | 15.79 | 0.000254505 |
| DLF012_GL0007335    | AEE27678.1   | Bifidobacterium breve ACS-071-V-Schbb               | 98.43  | 0.0 |     |       |             |
| DLF012_GL0007335    | AHJ14902.1   | Bifidobacterium breve 12L                           | 99.80  | 0.0 |     |       |             |
| DLF012_GL0007335    | AHJ16673.1   | Bifidobacterium breve JCM 7017                      | 99.02  | 0.0 |     |       |             |
| DLF012_GL0007335    | AHJ18438.1   | Bifidobacterium breve JCM 7019                      | 98.62  | 0.0 |     |       |             |
| DLF012_GL0007335    | AHJ20344.1   | Bifidobacterium breve NCFB 2258                     | 98.82  | 0.0 |     |       |             |
| DLF012_GL0007335    | AHJ22176.1   | Bifidobacterium breve 689b                          | 98.23  | 0.0 |     |       |             |
| DLF012_GL0007335    | AHJ24012.1   | Bifidobacterium breve S27                           | 100.00 | 0.0 |     |       |             |
| DLF012_GL0007335    | ALE14166.1   | Bifidobacterium breve BR3                           | 100.00 | 0.0 |     |       |             |
| DLF012_GL0007335    | AOP00147.1   | Bifidobacterium longum subsp. longum AH1206         | 100.00 | 0.0 |     |       |             |
| DLF012_GL0007335    | AQM42247.1   | Bifidobacterium breve LMC520                        | 100.00 | 0.0 |     |       |             |
| DLF012_GL0007335    | AUD68252.1   | Bifidobacterium breve NRBB02                        | 99.80  | 0.0 |     |       |             |
| DLF012_GL0007335    | AUD70093.1   | Bifidobacterium breve NRBB04                        | 98.82  | 0.0 |     |       |             |
| DLF012_GL0007335    | AUD80204.1   | Bifidobacterium breve NRBB51                        | 98.43  | 0.0 |     |       |             |
| DLF012_GL0007335    | AUD84177.1   | Bifidobacterium breve NRBB56                        | 99.61  | 0.0 |     |       |             |
| DLF012_GL0007335    | AUD86167.1   | Bifidobacterium breve NRBB57                        | 99.80  | 0.0 |     |       |             |
| DLF012_GL0007335    | AUD90252.1   | Bifidobacterium breve DRBB27                        | 98.43  | 0.0 |     |       |             |
| DLF012_GL0007335    | AUD92349.1   | Bifidobacterium breve DRBB28                        | 99.80  | 0.0 |     |       |             |
| DLF012_GL0007335    | AUD96362.1   | Bifidobacterium breve 082W48                        | 100.00 | 0.0 |     |       |             |
| DLF012_GL0007335    | AUD98250.1   | Bifidobacterium breve 139W423                       | 99.21  | 0.0 |     |       |             |
| DLF012_GL0007335    | AUE00260.1   | Bifidobacterium breve 180W83                        | 99.02  | 0.0 |     |       |             |
| DLF012_GL0007335    | AUE04356.1   | Bifidobacterium breve CNCM I-4321                   | 99.61  | 0.0 |     |       |             |
| DLF012_GL0007335    | AUE06461.1   | Bifidobacterium breve NRBB08                        | 99.80  | 0.0 |     |       |             |
| DLF012_GL0007335    | AUE08335.1   | Bifidobacterium breve NRBB18                        | 99.80  | 0.0 |     |       |             |
| DLF012_GL0007335    | AUE10210.1   | Bifidobacterium breve NRBB19                        | 99.80  | 0.0 |     |       |             |
| DLF012_GL0007335    | AUE12085.1   | Bifidobacterium breve NRBB20                        | 99.80  | 0.0 |     |       |             |
| DLF012_GL0007335    | AUE13960.1   | Bifidobacterium breve NRBB27                        | 99.80  | 0.0 |     |       |             |
| DLF012_GL0007335    | AUE15831.1   | Bifidobacterium breve NRBB49                        | 99.80  | 0.0 |     |       |             |
| DLF012_GL0007335    | AUE17680.1   | Bifidobacterium breve DRBB29                        | 98.43  | 0.0 |     |       |             |
| DLF012_GL0007335    | AUE19760.1   | Bifidobacterium breve DRBB30                        | 99.61  | 0.0 |     |       |             |
| DLF012_GL0007335    | BAQ99126.1   | Bifidobacterium breve DSM 20213 = JCM 1192          | 100.00 | 0.0 |     |       |             |
| O2_UC28-2_GL0074842 | AAN01605.1   | Bifidobacterium animalis subsp. lactis              | 99.60  | 0.0 | 98  | 7.73  | 7.27624e-05 |
| O2_UC28-2_GL0074842 | ACL28432.1   | Bifidobacterium animalis subsp. lactis AD011        | 100.00 | 0.0 |     |       |             |
| O2_UC28-2_GL0074842 | ACS45532.1   | Bifidobacterium animalis subsp. lactis BI-04        | 100.00 | 0.0 |     |       |             |
| O2_UC28-2_GL0074842 | ACS47099.1   | Bifidobacterium animalis subsp. lactis DSM 10140    | 100.00 | 0.0 |     |       |             |
| O2_UC28-2_GL0074842 | ADC85157.1   | Bifidobacterium animalis subsp. lactis BB-12        | 100.00 | 0.0 |     |       |             |
| O2_UC28-2_GL0074842 | ADG32722.1   | Bifidobacterium animalis subsp. lactis V9           | 100.00 | 0.0 |     |       |             |
| O2_UC28-2_GL0074842 | AEK92583.1   | Bifidobacterium animalis subsp. lactis CNCM I-2494  | 100.00 | 0.0 |     |       |             |
| O2_UC28-2_GL0074842 | AEN75912.1   | Bifidobacterium animalis subsp. lactis BLC1         | 100.00 | 0.0 |     |       |             |
| O2_UC28-2_GL0074842 | AFI62366.1   | Bifidobacterium animalis subsp. animalis ATCC 25527 | 99.60  | 0.0 |     |       |             |
| O2_UC28-2_GL0074842 | AFJ15894.1   | Bifidobacterium animalis subsp. lactis B420         | 100.00 | 0.0 |     |       |             |
| O2_UC28-2_GL0074842 | AFJ17455.1   | Bifidobacterium animalis subsp. lactis BI-07        | 100.00 | 0.0 |     |       |             |
| O2_UC28-2_GL0074842 | AGO51644.1   | Bifidobacterium animalis subsp. lactis BI12         | 100.00 | 0.0 |     |       |             |
| O2_UC28-2_GL0074842 | AGW84362.1   | Bifidobacterium animalis subsp. lactis ATCC 27673   | 93.86  | 0.0 |     |       |             |
| O2_UC28-2_GL0074842 | AIA32185.1   | Bifidobacterium animalis RH                         | 100.00 | 0.0 |     |       |             |
| O2_UC28-2_GL0074842 | AIZ15622.1   | Bifidobacterium pseudolongum PV8-2                  | 90.48  | 0.0 |     |       |             |
| O2_UC28-2_GL0074842 | AJC75873.1   | Bifidobacterium animalis subsp. lactis KLDS2.0603   | 100.00 | 0.0 |     |       |             |
| O2_UC28-2_GL0074842 | AJD33249.1   | Bifidobacterium animalis A6                         | 100.00 | 0.0 |     |       |             |
| O2_UC28-2_GL0074842 | AJD87912.1   | Bifidobacterium animalis subsp. lactis BF052        | 100.00 | 0.0 |     |       |             |
| O2_UC28-2_GL0074842 | ANU43431.1   | Bifidobacterium animalis subsp. animalis YL2        | 99.41  | 0.0 |     |       |             |
| O2_UC28-2_GL0074842 | ASL77072.1   | Bifidobacterium animalis BL3                        | 100.00 | 0.0 |     |       |             |
| O2_UC28-2_GL0074842 | ASW24530.1   | Bifidobacterium pseudolongum UMB-MBP-01             | 90.28  | 0.0 |     |       |             |



|                                              |                   |                                                                    |              |            |            |              |                    |
|----------------------------------------------|-------------------|--------------------------------------------------------------------|--------------|------------|------------|--------------|--------------------|
| O2.UC28-2_GL0074842                          | ATU20080.1        | Bifidobacterium choerinum FMB-1                                    | 90.69        | 0.0        |            |              |                    |
| O2.UC28-2_GL0074842                          | AXM93247.1        | Bifidobacterium animalis subsp. lactis S7                          | 100.00       | 0.0        |            |              |                    |
| O2.UC28-2_GL0074842                          | AXQ17362.1        | Bifidobacterium animalis subsp. lactis IDCC4301                    | 100.00       | 0.0        |            |              |                    |
| <b>MH0131_GL0101467</b>                      | <b>AA033821.1</b> | <b>Bifidobacterium adolescentis DSM 20083</b>                      | <b>99.80</b> | <b>0.0</b> | <b>577</b> | <b>45.54</b> | <b>0.00029932</b>  |
| MH0131_GL0101467                             | AI175493.1        | Bifidobacterium adolescentis 22L                                   | 99.80        | 0.0        |            |              |                    |
| MH0131_GL0101467                             | AJE05047.1        | Bifidobacterium adolescentis BBMN23                                | 99.80        | 0.0        |            |              |                    |
| MH0131_GL0101467                             | AVT44549.1        | Bifidobacterium adolescentis 1-11                                  | 99.40        | 0.0        |            |              |                    |
| MH0131_GL0101467                             | BAF38859.1        | Bifidobacterium adolescentis ATCC 15703                            | 99.80        | 0.0        |            |              |                    |
| MH0188_GL0103816                             | BAQ95689.1        | Bifidobacterium angulatum DSM 20098 = JCM 7096                     | 98.02        | 0.0        | 393        | 31.02        | 8.19933e-05        |
| MH0230_GL0139113                             | BAR02741.1        | Bifidobacterium pseudocatenulatum DSM 20438 = JCM 1200 = LMG 10505 | 99.60        | 0.0        | 437        | 34.49        | 0.00114584         |
| MH0230_GL0139113                             | CBK71507.1        | Bifidobacterium pseudocatenulatum D2CA                             | 99.40        | 0.0        |            |              |                    |
| MH0272_GL0199098                             | AI213729.1        | Bifidobacterium kashiwanohense PV20-2                              | 99.01        | 0.0        | 242        | 19.10        | 0.000100675        |
| MH0272_GL0199098                             | BAQ28208.1        | Bifidobacterium kashiwanohense JCM 15439 = DSM 21854               | 98.41        | 0.0        |            |              |                    |
| MH0272_GL0199098                             | BAR01027.1        | Bifidobacterium catenulatum DSM 16992 = JCM 1194 = LMG 11043       | 100.00       | 0.0        |            |              |                    |
| V1.CD7-0-PN_GL0043748                        | ADB08794.1        | Bifidobacterium dentium Bd1                                        | 99.80        | 0.0        | 142        | 11.21        | 4.67435e-05        |
| V1.CD7-0-PN_GL0043748                        | BAQ26093.1        | Bifidobacterium dentium JCM 1195 = DSM 20436                       | 99.80        | 0.0        |            |              |                    |
| 518635.BIFANG_02319                          | AMK57427.1        | Bifidobacterium angulatum GT102                                    | 100.00       | 0.0        | 84         | 6.63         | 1.62057e-05        |
| V1.CD7-0-PN_GL0000583                        | AGH40383.1        | Bifidobacterium thermophilum RBL67                                 | 96.62        | 0.0        | 2          | 0.16         | 4.33881e-05        |
| 511691.SmuNN2025_1133                        | AAN58596.1        | Streptococcus mutans UA159                                         | 99.17        | 0.0        | 68         | 5.37         | 5.58176e-06        |
| 511691.SmuNN2025_1133                        | AFM81308.1        | Streptococcus mutans GS-5                                          | 98.96        | 0.0        |            |              |                    |
| 511691.SmuNN2025_1133                        | AJD55242.1        | Streptococcus mutans UA159-FR                                      | 99.37        | 0.0        |            |              |                    |
| 511691.SmuNN2025_1133                        | AMF85569.1        | Streptococcus mutans NG8                                           | 99.17        | 0.0        |            |              |                    |
| 511691.SmuNN2025_1133                        | ARS62272.1        | Streptococcus mutans KCOM 1054 (= Choc YM3)                        | 98.96        | 0.0        |            |              |                    |
| 511691.SmuNN2025_1133                        | AVM71638.1        | Streptococcus mutans LAR01                                         | 99.17        | 0.0        |            |              |                    |
| 511691.SmuNN2025_1133                        | BAH88159.1        | Streptococcus mutans NN2025                                        | 100.00       | 0.0        |            |              |                    |
| 511691.SmuNN2025_1133                        | BAL69465.1        | Streptococcus mutans LJ23                                          | 99.40        | 0.0        |            |              |                    |
| 511691.SmuNN2025_1133                        | BAQ24527.1        | Streptococcus troglodytae TKU 31                                   | 97.51        | 0.0        |            |              |                    |
| <b>511691.SmuNN2025_1133</b>                 | <b>CAA30846.1</b> | <b>Streptococcus mutans INGBRITT / G55</b>                         | <b>97.50</b> | <b>0.0</b> |            |              |                    |
| 511691.SmuNN2025_1133                        | SQF48861.1        | Streptococcus mutans NCTC10449                                     | 99.38        | 0.0        |            |              |                    |
| 765135172-stool1_revised_C812172_1_gene66964 | CBL13462.1        | Roseburia intestinalis XB684                                       | 99.58        | 0.0        | 583        | 46.01        | 0.000599983        |
| MH0006_GL0203164                             | AWY97923.1        | Blautia sp. N6H1-15 KCTC 15426                                     | 97.97        | 0.0        | 860        | 67.88        | 0.000446549        |
| <b>MH0006_GL0203164</b>                      | <b>CCA61958.1</b> | <b>Ruminococcus gnavus E1</b>                                      | <b>97.97</b> | <b>0.0</b> |            |              |                    |
| <b>NOM023_GL0014561</b>                      | <b>ACR74281.1</b> | <b>Eubacterium rectale ATCC 33656</b>                              | <b>98.38</b> | <b>0.0</b> | <b>913</b> | <b>72.06</b> | <b>0.000744108</b> |
| NOM023_GL0014561                             | CBK89380.1        | [Eubacterium] rectale DSM 17629                                    | 98.98        | 0.0        |            |              |                    |
| NOM023_GL0014561                             | CBK94328.1        | [Eubacterium] rectale M104/1                                       | 99.19        | 0.0        |            |              |                    |
| O2.CD1-0-PT_GL0059378                        | AGS04734.1        | Streptococcus lutetiensis 033                                      | 99.38        | 0.0        | 58         | 4.58         | 4.76096e-05        |
| O2.CD1-0-PT_GL0059378                        | ALT82017.1        | Streptococcus infantarius ICDDR-B-NRC-S5                           | 99.17        | 0.0        |            |              |                    |
| O2.CD1-0-PT_GL0059378                        | BAK29318.1        | Streptococcus pasteurianus ATCC 43144                              | 96.67        | 0.0        |            |              |                    |
| O2.CD1-0-PT_GL0059378                        | CCF01511.1        | Streptococcus macedonicus ACA-DC 198                               | 99.58        | 0.0        |            |              |                    |
| O2.CD1-0-PT_GL0059378                        | SQF41508.1        | Streptococcus lutetiensis NCTC8738                                 | 99.17        | 0.0        |            |              |                    |
| O2.CD1-0-PT_GL0059378                        | SQG55569.1        | Streptococcus lutetiensis NCTC13774                                | 100.00       | 0.0        |            |              |                    |
| O2.CD1-0-PT_GL0059378                        | SQI07765.1        | Streptococcus pasteurianus NCTC13784                               | 96.67        | 0.0        |            |              |                    |
| 586220.HMPREF0555_1560                       | AA333736.1        | Leuconostoc mesenteroides NRRL B-1149                              | 98.98        | 0.0        | 24         | 1.89         | 8.56007e-07        |
| 586220.HMPREF0555_1560                       | ABJ61506.1        | Leuconostoc mesenteroides subsp. mesenteroides ATCC 8293           | 99.59        | 0.0        |            |              |                    |
| 586220.HMPREF0555_1560                       | ABW71903.1        | Leuconostoc mesenteroides B-1355                                   | 99.39        | 0.0        |            |              |                    |
| 586220.HMPREF0555_1560                       | ADK62363.1        | Leuconostoc mesenteroides MBFWRS-3(1)                              | 98.78        | 0.0        |            |              |                    |
| 586220.HMPREF0555_1560                       | AET29793.1        | Leuconostoc mesenteroides subsp. mesenteroides J18                 | 99.39        | 0.0        |            |              |                    |
| 586220.HMPREF0555_1560                       | AHF18539.1        | Leuconostoc mesenteroides KFRI-MG                                  | 99.59        | 0.0        |            |              |                    |
| 586220.HMPREF0555_1560                       | AKP36398.1        | Leuconostoc mesenteroides subsp. dextranicum DSM 20484             | 99.19        | 0.0        |            |              |                    |
| 586220.HMPREF0555_1560                       | APF76152.1        | Leuconostoc mesenteroides DRC1506                                  | 99.59        | 0.0        |            |              |                    |
| 586220.HMPREF0555_1560                       | API71478.1        | Leuconostoc suionicum DSM 20241                                    | 98.78        | 0.0        |            |              |                    |
| 586220.HMPREF0555_1560                       | AQU48795.1        | Leuconostoc mesenteroides subsp. mesenteroides DRC0211             | 99.39        | 0.0        |            |              |                    |
| 586220.HMPREF0555_1560                       | ARN62880.1        | Leuconostoc mesenteroides subsp. mesenteroides BD1710              | 99.19        | 0.0        |            |              |                    |
| 586220.HMPREF0555_1560                       | ASR68574.1        | Leuconostoc mesenteroides WiKim33                                  | 99.59        | 0.0        |            |              |                    |
| 586220.HMPREF0555_1560                       | AWV37281.1        | Leuconostoc mesenteroides CBA7131                                  | 99.59        | 0.0        |            |              |                    |
| <b>586220.HMPREF0555_1560</b>                | <b>BAA14344.1</b> | <b>Leuconostoc mesenteroides ATCC 12291</b>                        | <b>90.70</b> | <b>0.0</b> |            |              |                    |
| 586220.HMPREF0555_1560                       | BAX70034.1        | Leuconostoc suionicum LT-38                                        | 98.78        | 0.0        |            |              |                    |
| 586220.HMPREF0555_1560                       | BAX72008.1        | Leuconostoc mesenteroides LK-151                                   | 99.59        | 0.0        |            |              |                    |
| MH0345_GL0184076                             | CED94009.1        | Romboutsia ilealis CRIB                                            | 98.77        | 0.0        | 570        | 44.99        | 0.000157783        |
| ED9A_GL0077731                               | ARIS6983.1        | Streptococcus salivarius ATCC 27945                                | 98.97        | 0.0        | 239        | 18.86        | 5.9649e-05         |
| ED9A_GL0077731                               | ARIS59814.1       | Streptococcus salivarius ATCC 25975                                | 98.56        | 0.0        |            |              |                    |
| ED9A_GL0077731                               | SQF75623.1        | Streptococcus salivarius NCTC7366                                  | 98.56        | 0.0        |            |              |                    |
| DLM012_GL0046437                             | ALZ53602.1        | Enterococcus faecium 6E6                                           | 100.00       | 0.0        | 26         | 2.05         | 9.49445e-06        |
| DLM012_GL0046437                             | AMP62490.1        | Enterococcus faecium UW8175                                        | 99.38        | 0.0        |            |              |                    |
| DLM012_GL0046437                             | AOM14759.1        | Enterococcus faecium ISMMS_VRE_1                                   | 100.00       | 0.0        |            |              |                    |
| DLM012_GL0046437                             | AQT58538.1        | Enterococcus faecium VREF                                          | 99.79        | 0.0        |            |              |                    |
| DLM012_GL0046437                             | AQY33507.1        | Enterococcus faecium isolate 2014-VREF-268                         | 100.00       | 0.0        |            |              |                    |
| DLM012_GL0046437                             | AUH49069.1        | Enterococcus faecium SC4                                           | 100.00       | 0.0        |            |              |                    |
| DLM012_GL0046437                             | AVJ43906.1        | Enterococcus faecium 13-009                                        | 100.00       | 0.0        |            |              |                    |
| DLM012_GL0046437                             | AVJ46693.1        | Enterococcus faecium 13-022                                        | 99.79        | 0.0        |            |              |                    |
| DLM012_GL0046437                             | AWB15626.1        | Enterococcus faecium HL1                                           | 100.00       | 0.0        |            |              |                    |
| DLM012_GL0046437                             | AWV59852.1        | Enterococcus faecium CFSAN059070                                   | 100.00       | 0.0        |            |              |                    |
| DLM012_GL0046437                             | AWV62869.1        | Enterococcus faecium CFSAN059071                                   | 100.00       | 0.0        |            |              |                    |
| MH0400_GL0107993                             | ABQ83787.1        | Lactobacillus reuteri DSM 20016                                    | 100.00       | 0.0        | 13         | 1.03         | 1.2103e-05         |
| MH0400_GL0107993                             | AEIS6886.1        | Lactobacillus reuteri SD2112                                       | 100.00       | 0.0        |            |              |                    |
| <b>MH0400_GL0107993</b>                      | <b>AGK37834.1</b> | <b>Lactobacillus reuteri LTH5448</b>                               | <b>99.59</b> | <b>0.0</b> |            |              |                    |
| MH0400_GL0107993                             | AGN98627.1        | Lactobacillus reuteri I5007                                        | 100.00       | 0.0        |            |              |                    |
| MH0400_GL0107993                             | AGR64687.1        | Lactobacillus reuteri TD1                                          | 99.79        | 0.0        |            |              |                    |
| MH0400_GL0107993                             | ANU51845.1        | Lactobacillus reuteri I49                                          | 100.00       | 0.0        |            |              |                    |
| MH0400_GL0107993                             | AWD63077.1        | Lactobacillus reuteri WHH1689                                      | 99.38        | 0.0        |            |              |                    |
| MH0400_GL0107993                             | BAG25968.1        | Lactobacillus reuteri JCM 1112                                     | 100.00       | 0.0        |            |              |                    |
| MH0400_GL0107993                             | CUU12009.1        | Lactobacillus reuteri ATCC 53608                                   | 100.00       | 0.0        |            |              |                    |
| O2.UC21-1_GL0008570                          | AJT49663.1        | Lactobacillus mucosae LM1                                          | 99.79        | 0.0        | 93         | 7.34         | 0.000190068        |
| V1.CD7-0-PN_GL0025100                        | AKP01754.1        | Lactobacillus reuteri IRT                                          | 93.81        | 0.0        | 7          | 0.55         | 9.02923e-06        |
| V1.CD7-0-PN_GL0025100                        | AMY14476.1        | Lactobacillus reuteri ZLR003                                       | 93.81        | 0.0        |            |              |                    |
| T2D-31A_GL0045848                            | AMS07529.1        | Lactobacillus oris J-1                                             | 99.59        | 0.0        | 15         | 1.18         | 6.65498e-06        |
| 388919.S5A_1006                              | ABN44422.1        | Streptococcus sanguinis SK36                                       | 100.00       | 0.0        | 127        | 10.02        | 9.49495e-06        |
| 388919.S5A_1006                              | SQF71464.1        | Streptococcus sanguinis NCTC11086                                  | 98.96        | 0.0        |            |              |                    |
| 684738.LLKf_2259                             | ADA65829.1        | Lactococcus lactis subsp. lactis KF147                             | 100.00       | 0.0        | 6          | 0.47         | 6.43558e-07        |
| 684738.LLKf_2259                             | ATC62278.1        | Lactococcus raffinolactis WiKim0068                                | 97.30        | 0.0        |            |              |                    |
| O2.CD1-0_GL0015459                           | AGY37964.1        | Streptococcus sp. I-P16                                            | 98.12        | 0.0        | 263        | 20.76        | 1.95629e-05        |
| O2.CD1-0_GL0015459                           | AGY39509.1        | Streptococcus sp. I-G2                                             | 98.12        | 0.0        |            |              |                    |
| O2.UC34-0_GL0078155                          | ADQ59566.1        | Lactobacillus amylovorus GR1 1112                                  | 99.38        | 0.0        | 21         | 1.66         | 8.13506e-05        |
| O2.UC34-0_GL0078155                          | AD207705.1        | Lactobacillus acidophilus 30SC                                     | 100.00       | 0.0        |            |              |                    |
| O2.UC34-0_GL0078155                          | AE32401.1         | Lactobacillus amylovorus GR1118                                    | 100.00       | 0.0        |            |              |                    |
| O2.UC34-0_GL0078155                          | AOG26270.1        | Lactobacillus johnsonii BS15                                       | 99.79        | 0.0        |            |              |                    |
| O2.UC34-0_GL0078155                          | AUX16275.1        | Lactobacillus amylovorus JBD401                                    | 99.79        | 0.0        |            |              |                    |
| V1.CD7-0-PN_GL0008089                        | APG67766.1        | Lactobacillus delbrueckii subsp. lactis KCTC 3035                  | 99.79        | 0.0        | 12         | 0.95         | 1.42703e-05        |
| V1.CD7-0-PN_GL0008089                        | APG70160.1        | Lactobacillus delbrueckii subsp. lactis KCCM 34717                 | 99.58        | 0.0        |            |              |                    |
| V1.CD7-0-PN_GL0008089                        | APG70679.1        | Lactobacillus delbrueckii subsp. delbrueckii KCTC 13731            | 99.58        | 0.0        |            |              |                    |
| V1.CD7-0-PN_GL0008089                        | APG72592.1        | Lactobacillus delbrueckii subsp. jakobsenii ZN7a-9 = DSM 26046     | 99.79        | 0.0        |            |              |                    |
| V1.CD7-0-PN_GL0008089                        | APG73940.1        | Lactobacillus delbrueckii subsp. sunkii JCM 17838                  | 99.79        | 0.0        |            |              |                    |
| V1.CD7-0-PN_GL0008089                        | ARR37661.1        | Lactobacillus delbrueckii subsp. delbrueckii TUA4408L              | 99.58        | 0.0        |            |              |                    |
| V1.CD7-0-PN_GL0008089                        | ASW11009.1        | Lactobacillus delbrueckii subsp. lactis DSM 20072                  | 99.38        | 0.0        |            |              |                    |
| DLM012_GL0036753                             | CBL50849.1        | Lactobacillus crispatus ST1                                        | 99.38        | 0.0        | 17         | 1.34         | 2.11229e-05        |
| T2D-143A_GL0001632                           | AAS08245.1        | Lactobacillus johnsonii NCC 533                                    | 98.33        | 0.0        | 10         | 0.79         | 3.60764e-05        |
| T2D-143A_GL0001632                           | AE892607.1        | Lactobacillus johnsonii DPC 6026                                   | 97.29        | 0.0        |            |              |                    |
| T2D-143A_GL0001632                           | AOG26671.1        | Lactobacillus johnsonii BS15                                       | 99.79        | 0.0        |            |              |                    |
| T2D-143A_GL0001632                           | ARW75563.1        | Lactobacillus johnsonii UMNJ21                                     | 99.79        | 0.0        |            |              |                    |
| T2D-143A_GL0001632                           | ARW76477.1        | Lactobacillus johnsonii UMNJ22                                     | 99.79        | 0.0        |            |              |                    |

|                         |            |                                                              |        |     |     |       |             |
|-------------------------|------------|--------------------------------------------------------------|--------|-----|-----|-------|-------------|
| T2D-143A_GL0001632      | AXQ19806.1 | Lactobacillus johnsonii IDCC9203                             | 99.79  | 0.0 |     |       |             |
| 1069533.Sinf_0203       | AEZ61571.1 | Streptococcus infantarius subsp. infantarius CJ18            | 100.00 | 0.0 | 28  | 2.21  | 7.68987e-06 |
| 1069533.Sinf_0203       | ALT81551.1 | Streptococcus gallolyticus ICDDR8-NRC-S1                     | 93.33  | 0.0 |     |       |             |
| 1069533.Sinf_0203       | AQP41203.1 | Streptococcus gallolyticus subsp. gallolyticus DSM 16831     | 94.17  | 0.0 |     |       |             |
| 1069533.Sinf_0203       | BAK27136.1 | Streptococcus gallolyticus subsp. gallolyticus ATCC 43143    | 94.17  | 0.0 |     |       |             |
| 1069533.Sinf_0203       | CB112687.1 | Streptococcus gallolyticus UCN34                             | 94.17  | 0.0 |     |       |             |
| 1069533.Sinf_0203       | CB247385.1 | Streptococcus gallolyticus subsp. gallolyticus ATCC BAA-2069 | 94.17  | 0.0 |     |       |             |
| 1069533.Sinf_0203       | SQG78484.1 | Streptococcus gallolyticus NCTC13773                         | 94.17  | 0.0 |     |       |             |
| 272621.LBA0507          | AAO21861.1 | Lactobacillus acidophilus NCFM                               | 100.00 | 0.0 | 13  | 1.03  | 2.64401e-06 |
| 272621.LBA0507          | AGK93717.1 | Lactobacillus acidophilus La-14                              | 100.00 | 0.0 |     |       |             |
| 272621.LBA0507          | AJP45959.1 | Lactobacillus acidophilus FS14                               | 100.00 | 0.0 |     |       |             |
| 272621.LBA0507          | ASN46425.1 | Lactobacillus acidophilus ATCC 53544                         | 100.00 | 0.0 |     |       |             |
| 272621.LBA0507          | ASX14497.1 | Lactobacillus acidophilus LA1                                | 100.00 | 0.0 |     |       |             |
| 272621.LBA0507          | AVV86344.1 | Lactobacillus acidophilus DSM 20079                          | 100.00 | 0.0 |     |       |             |
| 272621.LBA1437          | AAO21868.1 | Lactobacillus acidophilus NCFM                               | 100.00 | 0.0 | 14  | 1.10  | 2.98329e-06 |
| 272621.LBA1437          | AGK94598.1 | Lactobacillus acidophilus La-14                              | 100.00 | 0.0 |     |       |             |
| 272621.LBA1437          | AJP46768.1 | Lactobacillus acidophilus FS14                               | 100.00 | 0.0 |     |       |             |
| 272621.LBA1437          | ASN47283.1 | Lactobacillus acidophilus ATCC 53544                         | 100.00 | 0.0 |     |       |             |
| 272621.LBA1437          | ASX15322.1 | Lactobacillus acidophilus LA1                                | 100.00 | 0.0 |     |       |             |
| 272621.LBA1437          | AVV87179.1 | Lactobacillus acidophilus DSM 20079                          | 100.00 | 0.0 |     |       |             |
| 748671.LCRIS_00503      | CBL49950.1 | Lactobacillus crispatus ST1                                  | 100.00 | 0.0 | 5   | 0.39  | 2.70444e-07 |
| 525326.HMPREF0514_11643 | ASY54590.1 | Lactobacillus gasseri DSM 14869                              | 96.62  | 0.0 | 43  | 3.39  | 1.09371e-05 |
| 864570.HMPREF9189_0227  | BAX31497.1 | Streptococcus pneumoniae KK0381                              | 94.66  | 0.0 | 155 | 12.23 | 1.04684e-05 |
| 864570.HMPREF9189_0227  | BBA09080.1 | Streptococcus oralis subsp. tigurinus osk_001                | 98.54  | 0.0 |     |       |             |
| 864570.HMPREF9189_0227  | CBZ00101.1 | Streptococcus oralis Uo5                                     | 97.92  | 0.0 |     |       |             |
| SZEY-40A_GL0011887      | AHW94064.1 | Enterobacter asburiae L1                                     | 93.69  | 0.0 | 54  | 4.26  | 1.43639e-05 |
| SZEY-40A_GL0011887      | AKK99801.1 | Enterobacter asburiae CAV1043                                | 91.89  | 0.0 |     |       |             |
| SZEY-40A_GL0011887      | AKZ73706.1 | Enterobacter cloacae complex sp. 35734                       | 98.42  | 0.0 |     |       |             |
| SZEY-40A_GL0011887      | ALL17884.1 | Enterobacter sp. E20                                         | 93.02  | 0.0 |     |       |             |
| SZEY-40A_GL0011887      | AMX04954.1 | Enterobacter asburiae ENIPBJ-CG1                             | 91.67  | 0.0 |     |       |             |
| SZEY-40A_GL0011887      | AMY66143.1 | Enterobacter cloacae colR/S                                  | 91.89  | 0.0 |     |       |             |
| SZEY-40A_GL0011887      | AOL12055.1 | Enterobacter sp. HK169                                       | 93.47  | 0.0 |     |       |             |
| SZEY-40A_GL0011887      | AOP95838.1 | Enterobacter rogenkampii DSM 16690                           | 99.10  | 0.0 |     |       |             |
| SZEY-40A_GL0011887      | AQT91398.1 | Enterobacter cloacae R11                                     | 99.09  | 0.0 |     |       |             |
| SZEY-40A_GL0011887      | ASD59450.1 | Enterobacter cloacae complex sp. ECNIH7                      | 92.34  | 0.0 |     |       |             |
| SZEY-40A_GL0011887      | ASG38242.1 | Enterobacter cloacae 7045K10                                 | 99.32  | 0.0 |     |       |             |
| SZEY-40A_GL0011887      | AUM03935.1 | Enterobacter sp. Crenshaw                                    | 92.57  | 0.0 |     |       |             |
| SZEY-40A_GL0011887      | AVG33789.1 | Enterobacter cloacae complex sp. FDAARGOS_77                 | 92.12  | 0.0 |     |       |             |
| SZEY-40A_GL0011887      | AVH19812.1 | Lelliottia nimpresuralis SGAir0187                           | 95.27  | 0.0 |     |       |             |
| 760570.HMPREF0833_10343 | ABP92721.1 | Streptococcus suis 98HAH33                                   | 90.48  | 0.0 | 85  | 6.71  | 4.42905e-06 |
| 760570.HMPREF0833_10343 | ADE31842.1 | Streptococcus suis GZ1                                       | 90.48  | 0.0 |     |       |             |
| 760570.HMPREF0833_10343 | ADV70581.1 | Streptococcus suis JS14                                      | 90.48  | 0.0 |     |       |             |
| 760570.HMPREF0833_10343 | AEB81819.1 | Streptococcus suis ST3                                       | 90.48  | 0.0 |     |       |             |
| 760570.HMPREF0833_10343 | AER15678.1 | Streptococcus suis SS12                                      | 90.48  | 0.0 |     |       |             |
| 760570.HMPREF0833_10343 | AER17727.1 | Streptococcus suis D9                                        | 90.02  | 0.0 |     |       |             |
| 760570.HMPREF0833_10343 | AER19785.1 | Streptococcus suis D12                                       | 90.25  | 0.0 |     |       |             |
| 760570.HMPREF0833_10343 | AER44706.1 | Streptococcus suis A7                                        | 90.48  | 0.0 |     |       |             |
| 760570.HMPREF0833_10343 | AFR00815.1 | Streptococcus suis S735                                      | 90.48  | 0.0 |     |       |             |
| 760570.HMPREF0833_10343 | AGG64897.1 | Streptococcus suis SC070731                                  | 90.48  | 0.0 |     |       |             |
| 760570.HMPREF0833_10343 | AGW87747.1 | Streptococcus suis YB51                                      | 90.48  | 0.0 |     |       |             |
| 760570.HMPREF0833_10343 | AGZ23643.1 | Streptococcus suis T15                                       | 90.48  | 0.0 |     |       |             |
| 760570.HMPREF0833_10343 | AHF59270.1 | Streptococcus suis 05HA568                                   | 90.25  | 0.0 |     |       |             |
| 760570.HMPREF0833_10343 | AG43977.1  | Streptococcus suis 6407                                      | 90.48  | 0.0 |     |       |             |
| 760570.HMPREF0833_10343 | AKG40804.1 | Streptococcus suis ZY05719                                   | 90.48  | 0.0 |     |       |             |
| 760570.HMPREF0833_10343 | ALA28420.1 | Streptococcus suis NSUI002                                   | 90.25  | 0.0 |     |       |             |
| 760570.HMPREF0833_10343 | AML46937.1 | Streptococcus suis NSUI060                                   | 90.02  | 0.0 |     |       |             |
| 760570.HMPREF0833_10343 | AMU80194.1 | Streptococcus suis 90-1330                                   | 90.25  | 0.0 |     |       |             |
| 760570.HMPREF0833_10343 | AND00266.1 | Streptococcus suis DN13                                      | 90.02  | 0.0 |     |       |             |
| 760570.HMPREF0833_10343 | QOM74985.1 | Streptococcus suis GZ0565                                    | 90.02  | 0.0 |     |       |             |
| 760570.HMPREF0833_10343 | ARL70362.1 | Streptococcus suis SC19                                      | 90.48  | 0.0 |     |       |             |
| 760570.HMPREF0833_10343 | ARX90789.1 | Streptococcus suis LSM102                                    | 90.48  | 0.0 |     |       |             |
| 760570.HMPREF0833_10343 | ATZ03119.1 | Streptococcus suis CZ130302                                  | 90.48  | 0.0 |     |       |             |
| 760570.HMPREF0833_10343 | AUA19441.1 | Streptococcus suis AH681                                     | 90.02  | 0.0 |     |       |             |
| 760570.HMPREF0833_10343 | AUW22360.1 | Streptococcus suis SS2-1                                     | 90.48  | 0.0 |     |       |             |
| 760570.HMPREF0833_10343 | AUW24394.1 | Streptococcus suis CS100322                                  | 90.48  | 0.0 |     |       |             |
| 760570.HMPREF0833_10343 | AUW25702.1 | Streptococcus suis HA0609                                    | 90.25  | 0.0 |     |       |             |
| 760570.HMPREF0833_10343 | AWL26309.1 | Streptococcus suis HN105                                     | 90.02  | 0.0 |     |       |             |
| 760570.HMPREF0833_10343 | AWY95846.1 | Streptococcus suis 0061                                      | 90.25  | 0.0 |     |       |             |
| 760570.HMPREF0833_10343 | AWY97841.1 | Streptococcus suis 1081                                      | 90.25  | 0.0 |     |       |             |
| 760570.HMPREF0833_10343 | AXI65214.1 | Streptococcus suis SH1510                                    | 90.25  | 0.0 |     |       |             |
| 760570.HMPREF0833_10343 | AXI67872.1 | Streptococcus suis JSHA1003                                  | 90.48  | 0.0 |     |       |             |
| 760570.HMPREF0833_10343 | CAR46849.1 | Streptococcus suis P1/7                                      | 90.48  | 0.0 |     |       |             |
| 760570.HMPREF0833_10343 | CAZ52175.1 | Streptococcus suis SC84                                      | 90.48  | 0.0 |     |       |             |
| 760570.HMPREF0833_10343 | CAZ56303.1 | Streptococcus suis BM407                                     | 90.48  | 0.0 |     |       |             |
| 760570.HMPREF0833_10343 | SQM00975.1 | Streptococcus suis NCTC10234                                 | 90.48  | 0.0 |     |       |             |
| T2D-132A_GL0014546      | AFP70303.1 | Enterobacter cloacae subsp. cloacae ENHUKU01                 | 99.52  | 0.0 | 40  | 3.16  | 5.49191e-06 |
| T2D-132A_GL0014546      | AIK54703.1 | Enterobacter cloacae ECNIH4                                  | 99.52  | 0.0 |     |       |             |
| T2D-132A_GL0014546      | AMJ70495.1 | Enterobacter cloacae isolate MBRL1077                        | 95.65  | 0.0 |     |       |             |
| T2D-132A_GL0014546      | AMZ78538.1 | Enterobacter sp. ODB01                                       | 100.00 | 0.0 |     |       |             |
| T2D-132A_GL0014546      | AOP87083.1 | Enterobacter kobei DSM 13645                                 | 99.28  | 0.0 |     |       |             |
| MH0277_GL0021133        | AJH00907.1 | Clostridium beijerinckii NCIMB 14988                         | 90.49  | 0.0 | 17  | 1.34  | 9.77707e-06 |
| MH0277_GL0021133        | ALP91351.1 | Clostridium butyricum KNU-L09                                | 100.00 | 0.0 |     |       |             |
| MH0277_GL0021133        | ALS17218.1 | Clostridium butyricum JKY6D1                                 | 97.69  | 0.0 |     |       |             |
| MH0277_GL0021133        | ALS17846.1 | Clostridium butyricum JKY6D1                                 | 100.00 | 0.0 |     |       |             |
| MH0277_GL0021133        | ANF14972.1 | Clostridium butyricum TOA                                    | 100.00 | 0.0 |     |       |             |
| MH0277_GL0021133        | AOR94981.1 | Clostridium butyricum TK520                                  | 100.00 | 0.0 |     |       |             |
| MH0277_GL0021133        | APF22777.1 | Clostridium butyricum CDC_51208                              | 97.17  | 0.0 |     |       |             |
| 656444.ECNG_03270       | ALL90725.1 | Escherichia coli 2009C-3133                                  | 97.89  | 0.0 | 79  | 6.24  | 4.83227e-05 |
| 656444.ECNG_03270       | AOM62674.1 | Escherichia coli CFSAN004177                                 | 95.26  | 0.0 |     |       |             |
| 656444.ECNG_03270       | APK44108.1 | Escherichia coli D10                                         | 97.89  | 0.0 |     |       |             |
| 656444.ECNG_03270       | AQU97032.1 | Escherichia coli MDR_56                                      | 98.16  | 0.0 |     |       |             |
| 656444.ECNG_03270       | AQV31938.1 | Escherichia coli Ecol_316                                    | 99.21  | 0.0 |     |       |             |
| 656444.ECNG_03270       | ARR60567.1 | Escherichia coli Z1002                                       | 99.21  | 0.0 |     |       |             |
| 656444.ECNG_03270       | ART16423.1 | Escherichia coli 95JB1                                       | 95.25  | 0.0 |     |       |             |
| 656444.ECNG_03270       | ASJ33782.1 | Escherichia coli PSUO78                                      | 97.89  | 0.0 |     |       |             |
| 656444.ECNG_03270       | ATM80274.1 | Escherichia coli FDAARGOS_448                                | 99.21  | 0.0 |     |       |             |
| 656444.ECNG_03270       | ATX43196.1 | Escherichia coli AR_0006                                     | 99.21  | 0.0 |     |       |             |
| 656444.ECNG_03270       | ATX59558.1 | Escherichia coli AR_0015                                     | 99.21  | 0.0 |     |       |             |
| 656444.ECNG_03270       | AUK06812.1 | Escherichia coli 14EC020                                     | 97.89  | 0.0 |     |       |             |
| 656444.ECNG_03270       | AUK22179.1 | Escherichia coli 14EC001                                     | 95.26  | 0.0 |     |       |             |
| 656444.ECNG_03270       | AUO36747.1 | Escherichia coli YDC107                                      | 99.21  | 0.0 |     |       |             |
| 656444.ECNG_03270       | AVJ69998.1 | Escherichia coli AR_0372                                     | 99.21  | 0.0 |     |       |             |
| 656444.ECNG_03270       | AVN09485.1 | Escherichia coli AR_0374                                     | 95.71  | 0.0 |     |       |             |
| 656444.ECNG_03270       | AVS48217.1 | Escherichia coli CFSAN018748                                 | 99.21  | 0.0 |     |       |             |
| 656444.ECNG_03270       | AWA17216.1 | Escherichia coli WCHEC4533                                   | 99.21  | 0.0 |     |       |             |
| 656444.ECNG_03270       | AWF16841.1 | Escherichia coli AR436                                       | 95.71  | 0.0 |     |       |             |
| 656444.ECNG_03270       | AWH71032.1 | Escherichia coli 104                                         | 97.89  | 0.0 |     |       |             |
| 656444.ECNG_03270       | AWO33046.1 | Escherichia coli DA33137                                     | 99.21  | 0.0 |     |       |             |
| 656444.ECNG_03270       | AXE68130.1 | Escherichia coli KL53                                        | 95.85  | 0.0 |     |       |             |
| 656444.ECNG_03270       | AXF91980.1 | Escherichia coli APEC O2-211                                 | 98.16  | 0.0 |     |       |             |
| 656444.ECNG_03270       | AXN83872.1 | Escherichia coli WCHEC96200                                  | 99.21  | 0.0 |     |       |             |
| 656444.ECNG_03270       | BAX10722.1 | Escherichia coli 20Ec-P-124                                  | 97.89  | 0.0 |     |       |             |
| 656444.ECNG_03270       | BBF47284.1 | Escherichia coli E2855                                       | 95.25  | 0.0 |     |       |             |

|                         |                   |                                                                          |              |            |            |              |                    |
|-------------------------|-------------------|--------------------------------------------------------------------------|--------------|------------|------------|--------------|--------------------|
| 656444.ECNG_03270       | BBF53075.1        | Escherichia coli E2863                                                   | 95.25        | 0.0        |            |              |                    |
| 656444.ECNG_03270       | BBF59028.1        | Escherichia coli E2865                                                   | 95.25        | 0.0        |            |              |                    |
| 353496.LBU_0042         | ABJ57747.1        | Lactobacillus delbrueckii subsp. bulgaricus ATCC BAA-365                 | 98.02        | 0.0        | 39         | 3.08         | 4.88042e-06        |
| 353496.LBU_0042         | ADY84227.1        | Lactobacillus delbrueckii subsp. bulgaricus 2038                         | 100.00       | 0.0        |            |              |                    |
| 353496.LBU_0042         | ALT46490.1        | Lactobacillus delbrueckii subsp. bulgaricus MN-BM-F01                    | 98.68        | 0.0        |            |              |                    |
| 353496.LBU_0042         | AXI14199.1        | Lactobacillus delbrueckii subsp. bulgaricus L99                          | 99.66        | 0.0        |            |              |                    |
| NLM027_GLO036283        | AAK75965.1        | Streptococcus pneumoniae TIGR4                                           | 96.76        | 0.0        | 115        | 9.08         | 1.10996e-05        |
| NLM027_GLO036283        | AAL00512.1        | Streptococcus pneumoniae R6                                              | 96.76        | 0.0        |            |              |                    |
| NLM027_GLO036283        | AAT15575.1        | Streptococcus pneumoniae                                                 | 95.87        | 0.0        |            |              |                    |
| NLM027_GLO036283        | ABJ53943.1        | Streptococcus pneumoniae D39                                             | 96.76        | 0.0        |            |              |                    |
| NLM027_GLO036283        | ACA36341.1        | Streptococcus pneumoniae Hungary19A-6                                    | 97.05        | 0.0        |            |              |                    |
| NLM027_GLO036283        | ACB91119.1        | Streptococcus pneumoniae CGSP14                                          | 96.76        | 0.0        |            |              |                    |
| NLM027_GLO036283        | ACO17210.1        | Streptococcus pneumoniae 70585                                           | 96.76        | 0.0        |            |              |                    |
| NLM027_GLO036283        | ACO18566.1        | Streptococcus pneumoniae JJA                                             | 96.76        | 0.0        |            |              |                    |
| NLM027_GLO036283        | ACO20167.1        | Streptococcus pneumoniae P1031                                           | 96.76        | 0.0        |            |              |                    |
| NLM027_GLO036283        | ACO23943.1        | Streptococcus pneumoniae Taiwan19F-14                                    | 97.05        | 0.0        |            |              |                    |
| NLM027_GLO036283        | AD170351.1        | Streptococcus pneumoniae TCH8431/19A                                     | 96.76        | 0.0        |            |              |                    |
| NLM027_GLO036283        | ADM85475.1        | Streptococcus pneumoniae AP200                                           | 96.76        | 0.0        |            |              |                    |
| NLM027_GLO036283        | ADM92021.1        | Streptococcus pneumoniae 670-6B                                          | 95.87        | 0.0        |            |              |                    |
| NLM027_GLO036283        | AF95446.1         | Streptococcus pneumoniae ST556                                           | 97.05        | 0.0        |            |              |                    |
| NLM027_GLO036283        | AF543882.1        | Streptococcus pneumoniae gamPNI0373                                      | 96.76        | 0.0        |            |              |                    |
| NLM027_GLO036283        | AG248385.1        | Streptococcus pneumoniae A026                                            | 96.76        | 0.0        |            |              |                    |
| NLM027_GLO036283        | AH247204.1        | Streptococcus sp. VT 162                                                 | 98.82        | 0.0        |            |              |                    |
| NLM027_GLO036283        | AJD72856.1        | Streptococcus pneumoniae NT_110_58                                       | 96.46        | 0.0        |            |              |                    |
| NLM027_GLO036283        | ALD68640.1        | Streptococcus mitis KCOM 1350 (= ChDC B183)                              | 96.76        | 0.0        |            |              |                    |
| NLM027_GLO036283        | AN037675.1        | Streptococcus pneumoniae D219                                            | 96.76        | 0.0        |            |              |                    |
| NLM027_GLO036283        | ANR74643.1        | Streptococcus sp. oral taxon 064 W10853                                  | 97.94        | 0.0        |            |              |                    |
| NLM027_GLO036283        | AOG56676.1        | Streptococcus pneumoniae D122                                            | 96.76        | 0.0        |            |              |                    |
| NLM027_GLO036283        | AOG58855.1        | Streptococcus pneumoniae D141                                            | 96.76        | 0.0        |            |              |                    |
| NLM027_GLO036283        | APJ31186.1        | Streptococcus pneumoniae SP49                                            | 97.05        | 0.0        |            |              |                    |
| NLM027_GLO036283        | APJ33195.1        | Streptococcus pneumoniae SP61                                            | 96.76        | 0.0        |            |              |                    |
| NLM027_GLO036283        | APJ35220.1        | Streptococcus pneumoniae SP64                                            | 96.76        | 0.0        |            |              |                    |
| NLM027_GLO036283        | ARD35477.1        | Streptococcus pneumoniae Hu17                                            | 97.05        | 0.0        |            |              |                    |
| NLM027_GLO036283        | ARD37669.1        | Streptococcus pneumoniae Hu15                                            | 97.05        | 0.0        |            |              |                    |
| NLM027_GLO036283        | ATF56164.1        | Streptococcus oralis FDAARGOS_367                                        | 98.23        | 0.0        |            |              |                    |
| NLM027_GLO036283        | AUB83032.1        | Streptococcus pneumoniae 19F                                             | 96.76        | 0.0        |            |              |                    |
| NLM027_GLO036283        | AUC46126.1        | Streptococcus pneumoniae 11A                                             | 96.46        | 0.0        |            |              |                    |
| NLM027_GLO036283        | AUF85585.1        | Streptococcus pneumoniae Xen35                                           | 96.76        | 0.0        |            |              |                    |
| NLM027_GLO036283        | AVD75788.1        | Streptococcus pneumoniae 335                                             | 96.76        | 0.0        |            |              |                    |
| NLM027_GLO036283        | AVN86743.1        | Streptococcus pneumoniae D39V                                            | 96.76        | 0.0        |            |              |                    |
| NLM027_GLO036283        | AVV92029.1        | Streptococcus pneumoniae CP2215                                          | 97.05        | 0.0        |            |              |                    |
| NLM027_GLO036283        | AXJ89066.1        | Streptococcus pneumoniae SPN XDR SMC1710-32                              | 96.46        | 0.0        |            |              |                    |
| NLM027_GLO036283        | AXK92092.1        | Streptococcus pneumoniae EF3030                                          | 97.05        | 0.0        |            |              |                    |
| NLM027_GLO036283        | BAW85350.1        | Streptococcus pneumoniae KK0981                                          | 96.46        | 0.0        |            |              |                    |
| NLM027_GLO036283        | BAX33769.1        | Streptococcus pneumoniae KK1157                                          | 96.46        | 0.0        |            |              |                    |
| NLM027_GLO036283        | BBAS59836.1       | Streptococcus pneumoniae MDRSPN001                                       | 97.35        | 0.0        |            |              |                    |
| NLM027_GLO036283        | CAR69671.1        | Streptococcus pneumoniae ATCC 700669                                     | 96.76        | 0.0        |            |              |                    |
| NLM027_GLO036283        | CBW33316.1        | Streptococcus pneumoniae OXC141                                          | 97.05        | 0.0        |            |              |                    |
| NLM027_GLO036283        | CBW35347.1        | Streptococcus pneumoniae INV200                                          | 96.76        | 0.0        |            |              |                    |
| NLM027_GLO036283        | CBW37314.1        | Streptococcus pneumoniae INV104                                          | 96.76        | 0.0        |            |              |                    |
| NLM027_GLO036283        | CCM07647.1        | Streptococcus pneumoniae SPNA45                                          | 96.76        | 0.0        |            |              |                    |
| NLM027_GLO036283        | CCP31393.1        | Streptococcus pneumoniae SPN994038 SNP994038                             | 97.05        | 0.0        |            |              |                    |
| NLM027_GLO036283        | CCP33378.1        | Streptococcus pneumoniae SPN034183 SNP034183                             | 97.05        | 0.0        |            |              |                    |
| NLM027_GLO036283        | CCP35352.1        | Streptococcus pneumoniae SPN994039 SNP994039                             | 97.05        | 0.0        |            |              |                    |
| NLM027_GLO036283        | COT14529.1        | Streptococcus pneumoniae NCTC7465                                        | 96.76        | 0.0        |            |              |                    |
| NLM027_GLO036283        | CR162411.1        | Streptococcus pneumoniae A66                                             | 97.05        | 0.0        |            |              |                    |
| NLM027_GLO036283        | SQG02735.1        | Streptococcus pneumoniae NCTC7466                                        | 96.76        | 0.0        |            |              |                    |
| NLM027_GLO036283        | SQG34950.1        | Streptococcus pneumoniae NCTC13276                                       | 96.76        | 0.0        |            |              |                    |
| NLM027_GLO036283        | SQG99370.1        | Streptococcus pneumoniae NCTC11902                                       | 97.05        | 0.0        |            |              |                    |
| HT8A_GLO006477          | ACJ51257.1        | Bifidobacterium longum subsp. infantis ATCC 15697 = JCM 1222 = DSM 20088 | 98.94        | 0.0        | 149        | 11.76        | 0.000142179        |
| HT8A_GLO006477          | ADG99593.1        | Bifidobacterium longum subsp. longum JDM301                              | 99.29        | 0.0        |            |              |                    |
| HT8A_GLO006477          | AIF89702.1        | Bifidobacterium longum BXY01                                             | 99.29        | 0.0        |            |              |                    |
| HT8A_GLO006477          | AJT55532.1        | Bifidobacterium longum                                                   | 97.17        | 0.0        |            |              |                    |
| HT8A_GLO006477          | ALE08855.1        | Bifidobacterium longum subsp. infantis BT1                               | 98.94        | 0.0        |            |              |                    |
| HT8A_GLO006477          | AUD82175.1        | Bifidobacterium breve NRBB52                                             | 98.94        | 0.0        |            |              |                    |
| HT8A_GLO006477          | AUD88275.1        | Bifidobacterium breve DRBB26                                             | 98.94        | 0.0        |            |              |                    |
| HT8A_GLO006477          | AUD94439.1        | Bifidobacterium breve O17W439                                            | 98.59        | 0.0        |            |              |                    |
| HT8A_GLO006477          | AUE02155.1        | Bifidobacterium breve 215W447a                                           | 98.59        | 0.0        |            |              |                    |
| HT8A_GLO006477          | BAJ67724.1        | Bifidobacterium longum subsp. infantis ATCC 15697 = JCM 1222 = DSM 20088 | 98.94        | 0.0        |            |              |                    |
| HT8A_GLO006477          | SDO29056.1        | Bifidobacterium longum Su859                                             | 98.59        | 0.0        |            |              |                    |
| <b>MH0028_GLO007151</b> | <b>ASM68470.1</b> | <b>Blautia henselii DSM 20583</b>                                        | <b>97.79</b> | <b>0.0</b> | <b>645</b> | <b>50.91</b> | <b>0.000278924</b> |
| MH0432_GLO161201        | ACD98776.1        | Bifidobacterium longum DIO10A                                            | 99.60        | 0.0        | 382        | 30.15        | 0.000133166        |
| MH0432_GLO161201        | ALE35293.1        | Bifidobacterium longum BG7                                               | 99.60        | 0.0        |            |              |                    |

**Figure S1: RgSPP purification.** A. RgSPP was first purified on Ni-NTA column and eluted with 125 mM imidazole in MOPS buffer pH 7.4. B. RgSPP was then purified using SEC S200 26/60 column using 50 mM HEPES pH 7.0 with NaCl 150 mM.

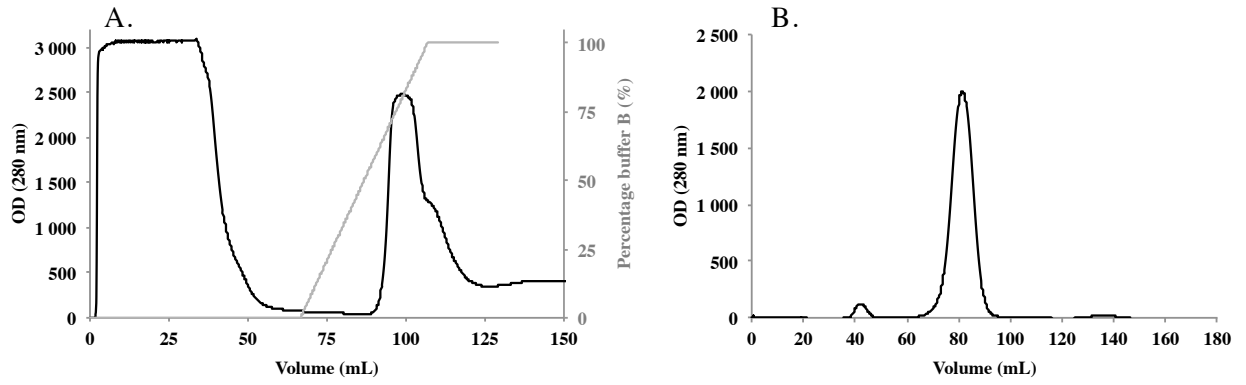

**Figure S2: SDS-PAGE of the purified *RgSPP*.**

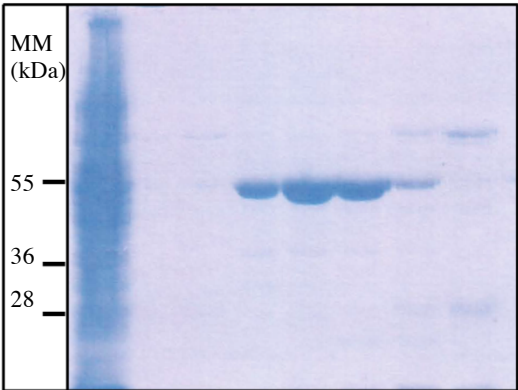

**Figure S3: G1P production analysis.** Sucrose and S6<sup>F</sup>P were used as substrates in (A) and (B), respectively. The grey lines (full circle) correspond to NADPH released from the G1P production by RgSPP, whereas dark lines (full square) correspond to the reaction with the SP from *Leuconostoc mesenteroides* used as positive control.

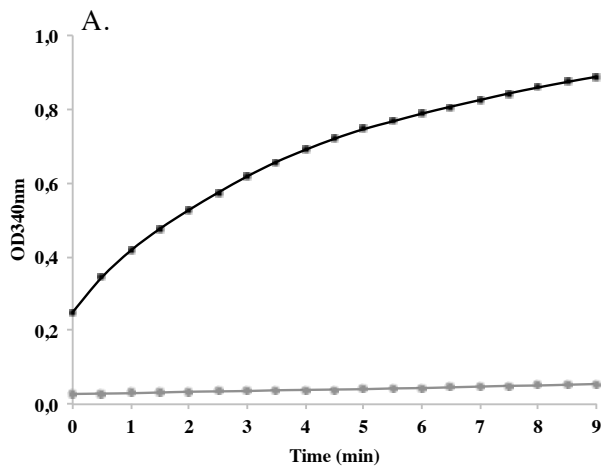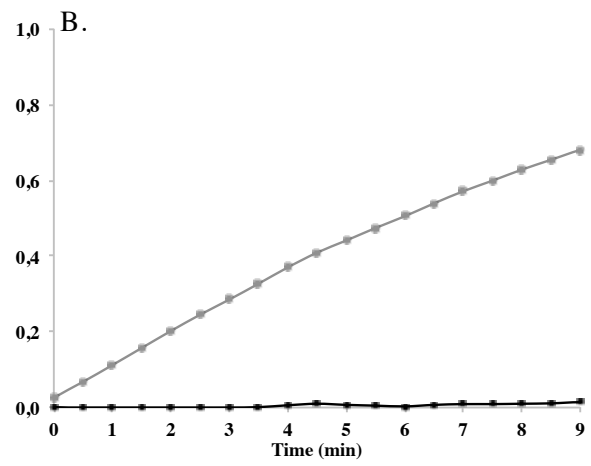

**Figure S4: Biochemical parameters of *RgSPP*.** The pH (A) and temperature (B) profiles for phosphorolysis of S6<sup>F</sup>P by *RgSPP*.

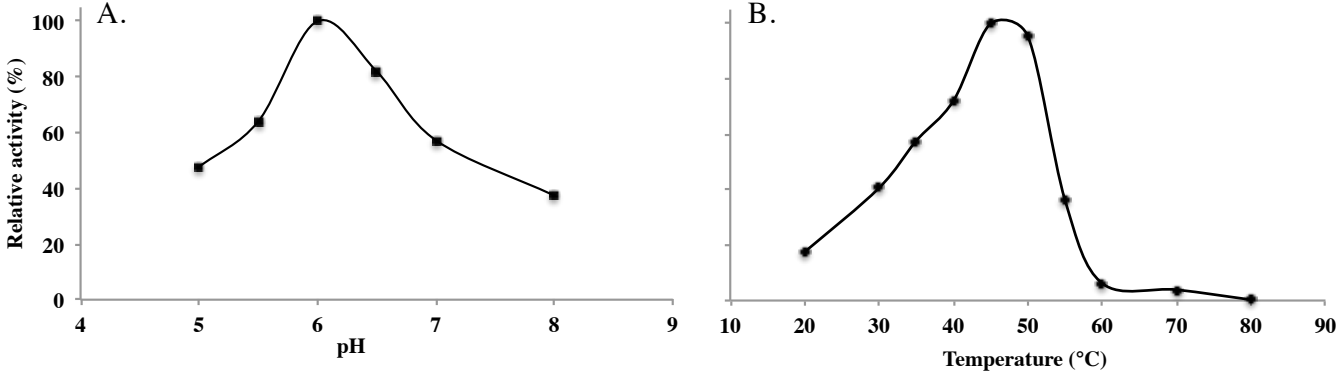

**Figure S5: Sequence alignment of characterized GH13\_18 members.**

Multiple sequence alignment of characterized GH13\_18 members using MAFFT EINSI advanced mode [47]. The secondary structures of AAO33821 from *B. adolescentis* have been solved using ESPrit [48]. Alpha helix is indicated with a loop while the beta strand is indicated with double horizontal bars. The fully, strongly and weakly conserved residues are marked with stars, colons and dots, respectively. The catalytic amino acid residues are in bold red. The transition state stabilizer from the catalytic triad is in bold green. The seven highly conserved domains (CSR) are squared in blue and the domain name is indicated. The position corresponding to the RgSPP-Y355 residue is squared in orange.







```

1R7A:A_PDB      == yyy      =====
AAO33821_B.adol  LTFEPKRGGLVDNTPVAMLEWEDSAGDHRSDDLIA-----
AAD40317_P.sacc  LRVNFA-----SLDH---ELSCSRRRRD-RAFAFS-----
BAF62433_B.long  LTFEPGRGLGTDNATPVASLAWSDAAGDHETRDLLA-----
AAO84039_B.long  LTFEPGRGLGTDNATPVASLAWSDAAGDHETRDLLA-----
AAN58596_S.muta  AEINLQ-----DMTY---RVTENDQTIS-FE-----
AAK33736_L.mese  LVANAA-----DKTF---TITANGEEIL-ANTEADK-----
BAA14344_L.mese  LTADAA-----NKTF---EIVENGQTVM-SSDNLQ-----
2207198A_L.mese  LTADAA-----NKTF---EIVENDQTVM-SSDNLQ-----
ABS59292_L.mese  LLANAK-----TRTF---VITAMGKTVL-QNK-----
AGK37834_L.reut  LDADAA-----NKTF---TITANGKVM-EQK-----
ADL69407_T.ther  LFIDLK-----TYKT---TIDYINENGE-EVKYLV-----
ADP98617_M.adha  LFVDLN-----FKTV---KVTYTDVETG-ETRHLEK-----
CAA61958_R.gnav  LYVNF-----SGTY---TIVESK-----
ADH62582_M.silv  CYINVT-----DRPQ---VVSRIKGLI-TGQWFTG-----VLKPY
AEJ61152_S.ther  CLINVS-----HIEQECVFPSSIERTAP-DAHLFTELTSGDTLVVYREDEDRFISLGGY
AKR24578_E.coli  GLFNVS-----KNIQHVNITNLHGRDLI-SEVDILG-----NEITLRPW
;

```

```

1R7A:A_PDB
AAO33821_B.adol  ----NPPVVA--
AAD40317_P.sacc  -----
BAF62433_B.long  ----NPPADIID
AAO84039_B.long  ----NPPADIID
AAN58596_S.muta  -----
AAK33736_L.mese  ----QQL-----
BAA14344_L.mese  ----N-----
2207198A_L.mese  ----N-----
ABS59292_L.mese  -----
AGK37834_L.reut  -----
ADL69407_T.ther  -----
ADP98617_M.adha  -----
CAA61958_R.gnav  -----
ADH62582_M.silv  QAAWIID-----
AEJ61152_S.ther  EVLWLTPEYRDKG
AKR24578_E.coli  QVMWIK-----

```
